# Supplementary material
Source: PubMed Central journal article supplement (PMC9835820)
Supplement: ao2c03007_si_001.pdf [file ao2c03007_si_001.pdf]

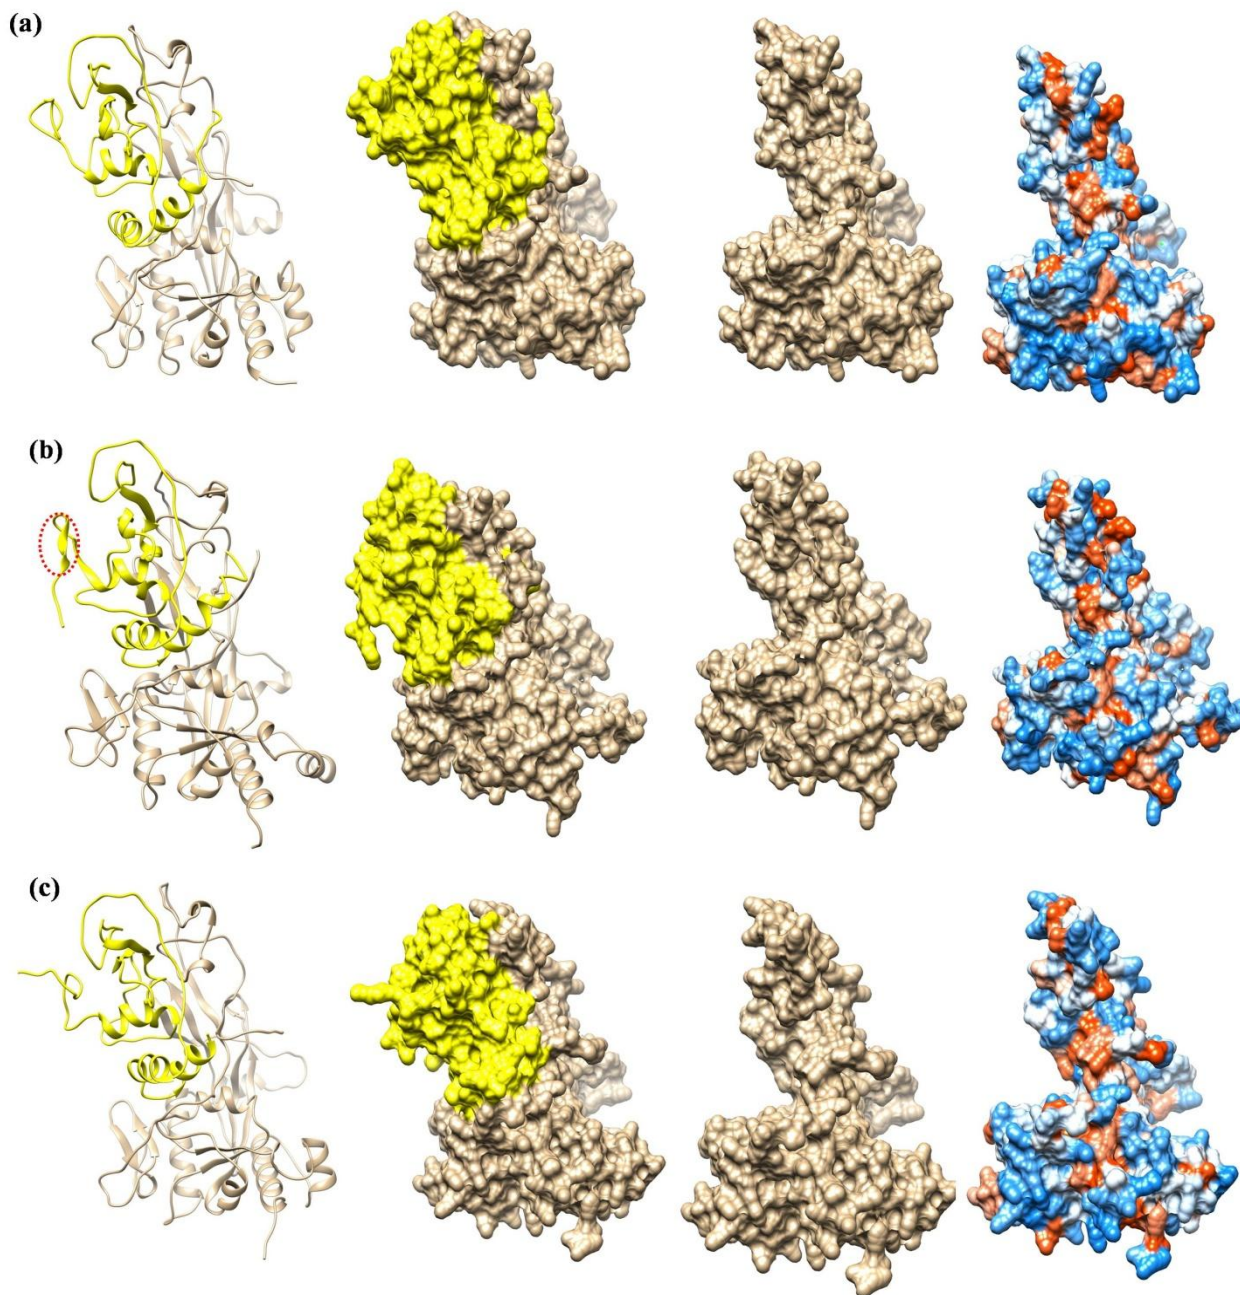

**Figure S3.** Representation of hydrophobicity map of average structure (from last 20 ns) SARS-CoV-2 (a), SARS-CoV (b) and (c) MERS-CoV NSP14-NSP10 PPI complex in three different forms. Yellow colour depiction is for NSP10, Brown colour is NSP14. The nonpolar (orange), polar (blue) and neutral regions are depicted for the NSP14.

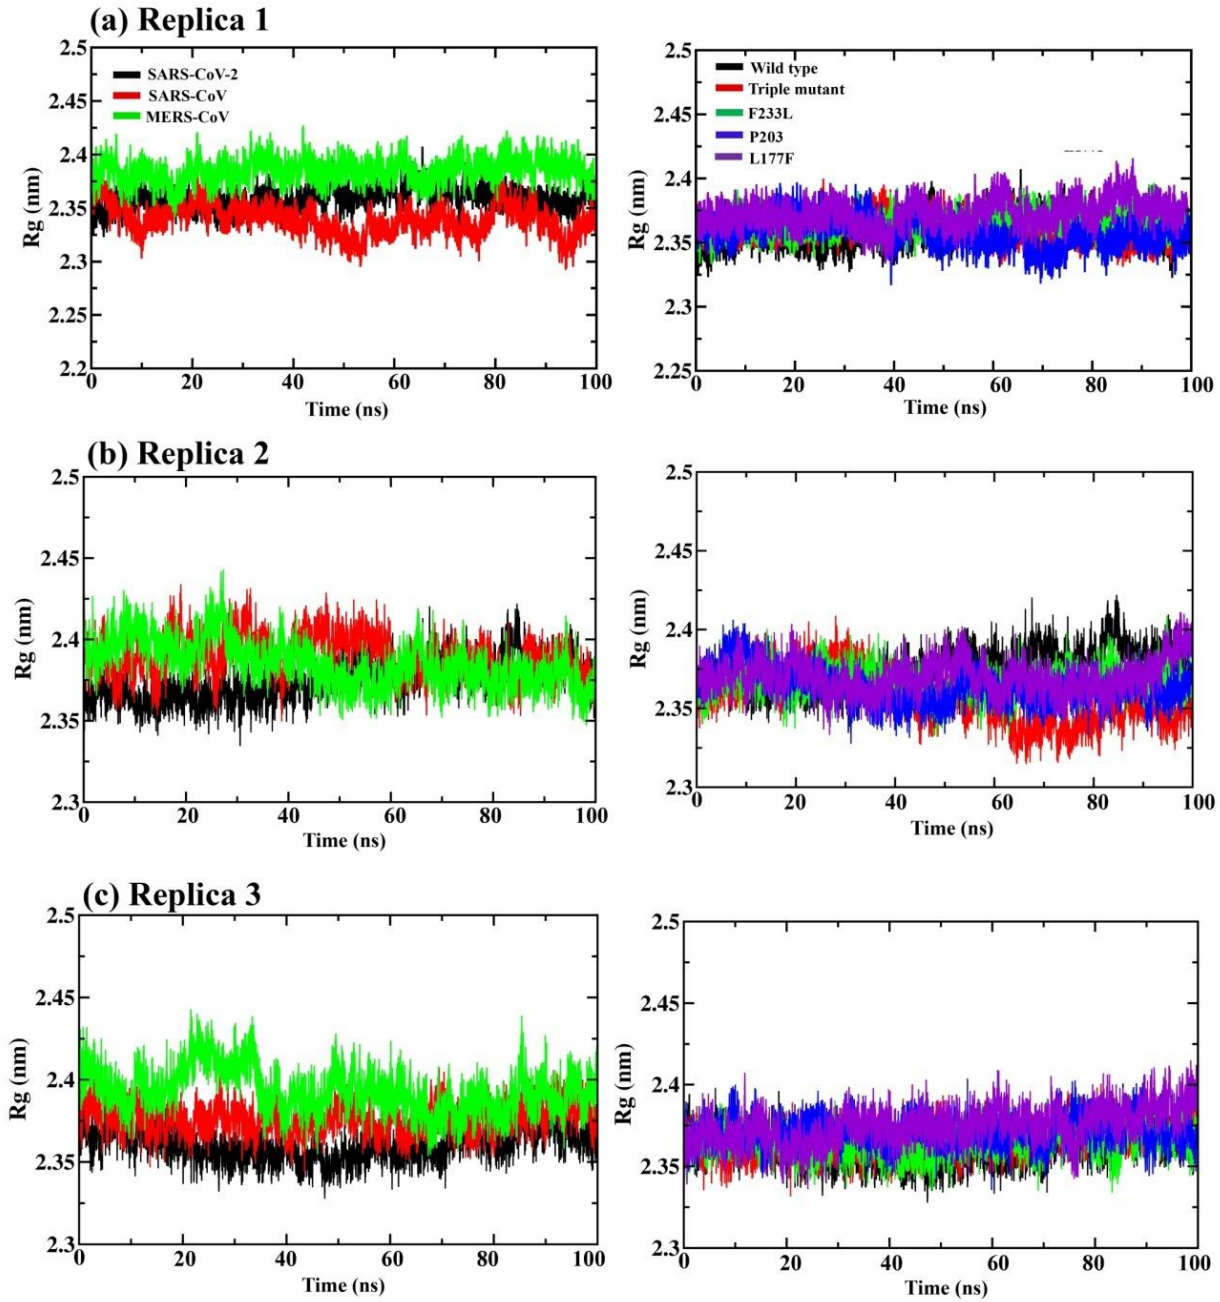

**Figure S4.** Radius of gyration (Rg) graphs (a) – (c) of NSP14-NSP10 complexes of SARS-CoV-2, SARS-CoV, MERS-CoV (left side) and SARS-CoV-2 NSP14<sup>mutant</sup> complexes (right side) along the three sets of 100 ns MD simulation. Triple mutant (in red, in the left plots) is the combination of the three (F233L, P203, L177F) mutations.

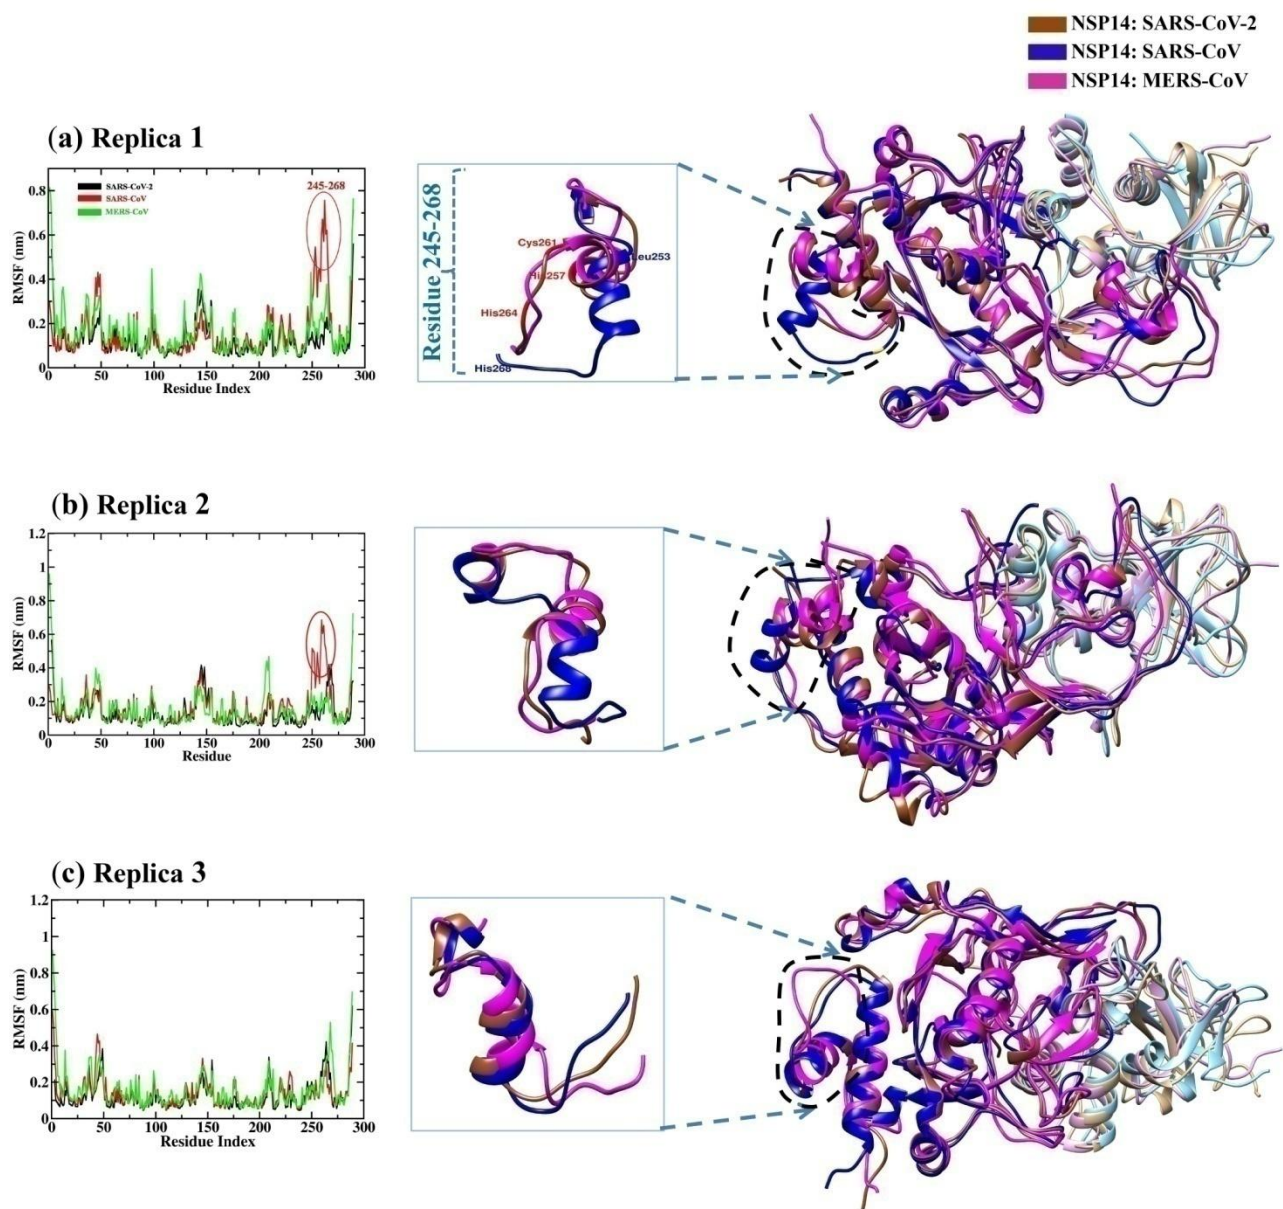

**Figure S5.** Superimposed average structures (extracted from the last 20 ns MD trajectories of three sets of MD simulation) of SARS-CoV-2 NSP14-NSP10 complex with SARS-CoV and MERS-CoV (a)-(c). On the left side is the NSP14 RMSF plot depicts the C-terminal fluctuating residues encircled in red (from residue 245-268) in replica 1 (a) and 2 (b). The middle square box represents the corresponding fluctuating residue (245-268).

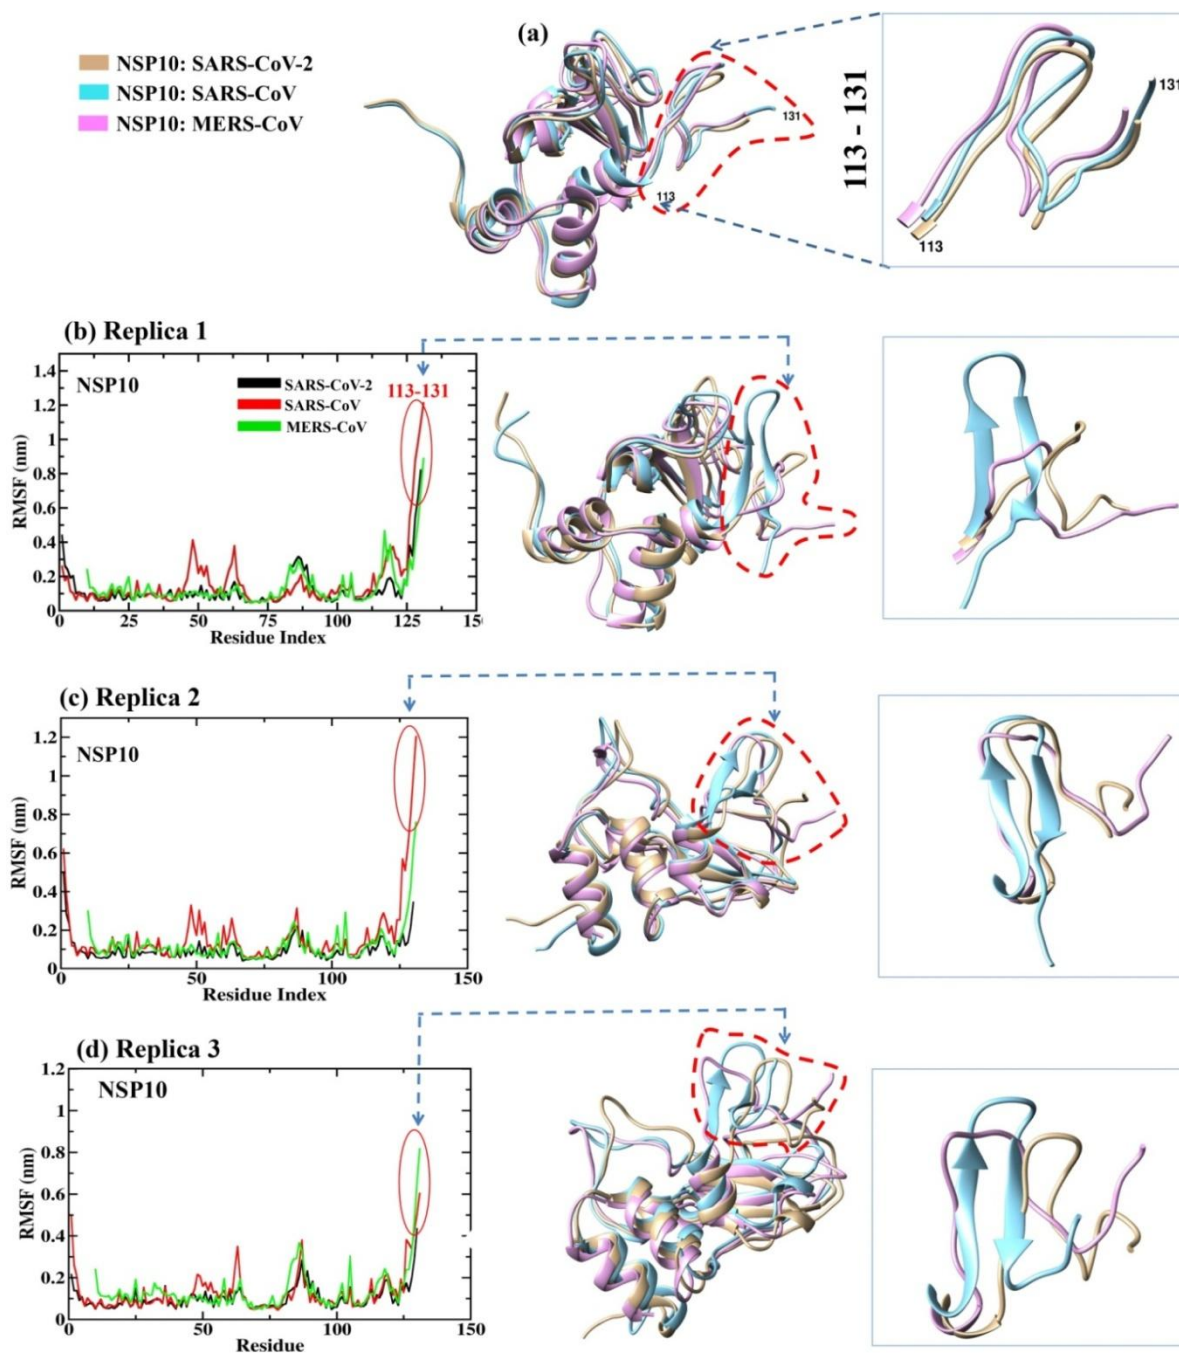

**Figure S6** Superimposed average structures(from last 20 ns) of (a) NSP10 SARS-CoV-2(light brown), SARS-CoV (cyan) and MERS-CoV (pink) from the three (b)-(d) sets of MD simulation. Left side represents the RMSF of NSP10 from the three sets of MD simulation (b)-(d). In the middle, superimposed NSP10 3D structure of the three viruses is depicted. On the right side in a square box fluctuating N-terminal region has been focused ranging from 113-131, shows a conformational change from coil to beta strand in case of SARS-CoV (cyan) in all the three sets (b)-(d) of MD simulations.

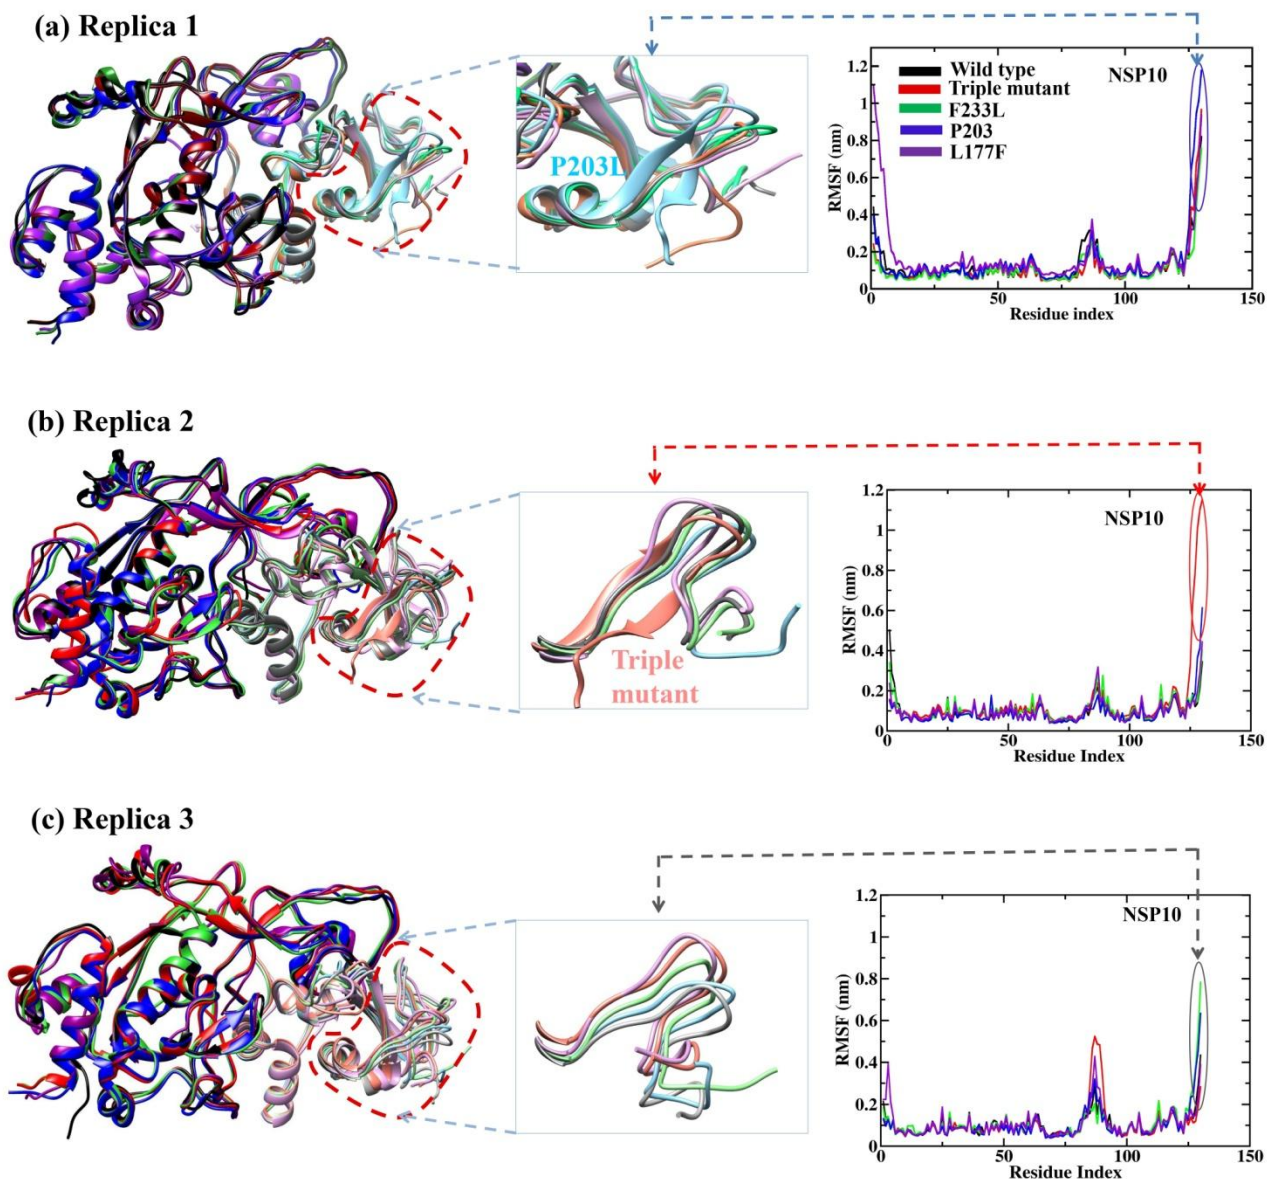

**Figure S7.** (a) – (c) On the left side, representation of superimposed SARS-CoV-2 mutant average structures (from last 20 ns) of NSP14-NSP10 from all the three sets of MD simulations. In a square box in the middle, represented the C terminal fluctuation ranging from residue 113-131 in the NSP10 when it is in complex with mutated NSP14. (a) In case of replica 1, NSP10 with NSP14 (P203L) mutant, shows a conformational change from coil to beta strand. (b) In replica 2, NSP10 with NSP14 (Triple) mutant, shows a conformational change from coil to beta strand. (c) In replica 3, in the right side RMSF plot, does not show much fluctuation as compared to replica 1 and 2, therefore there are no conformational changes observed at position 113-131 (in the middle figure in a square box of replica 3).

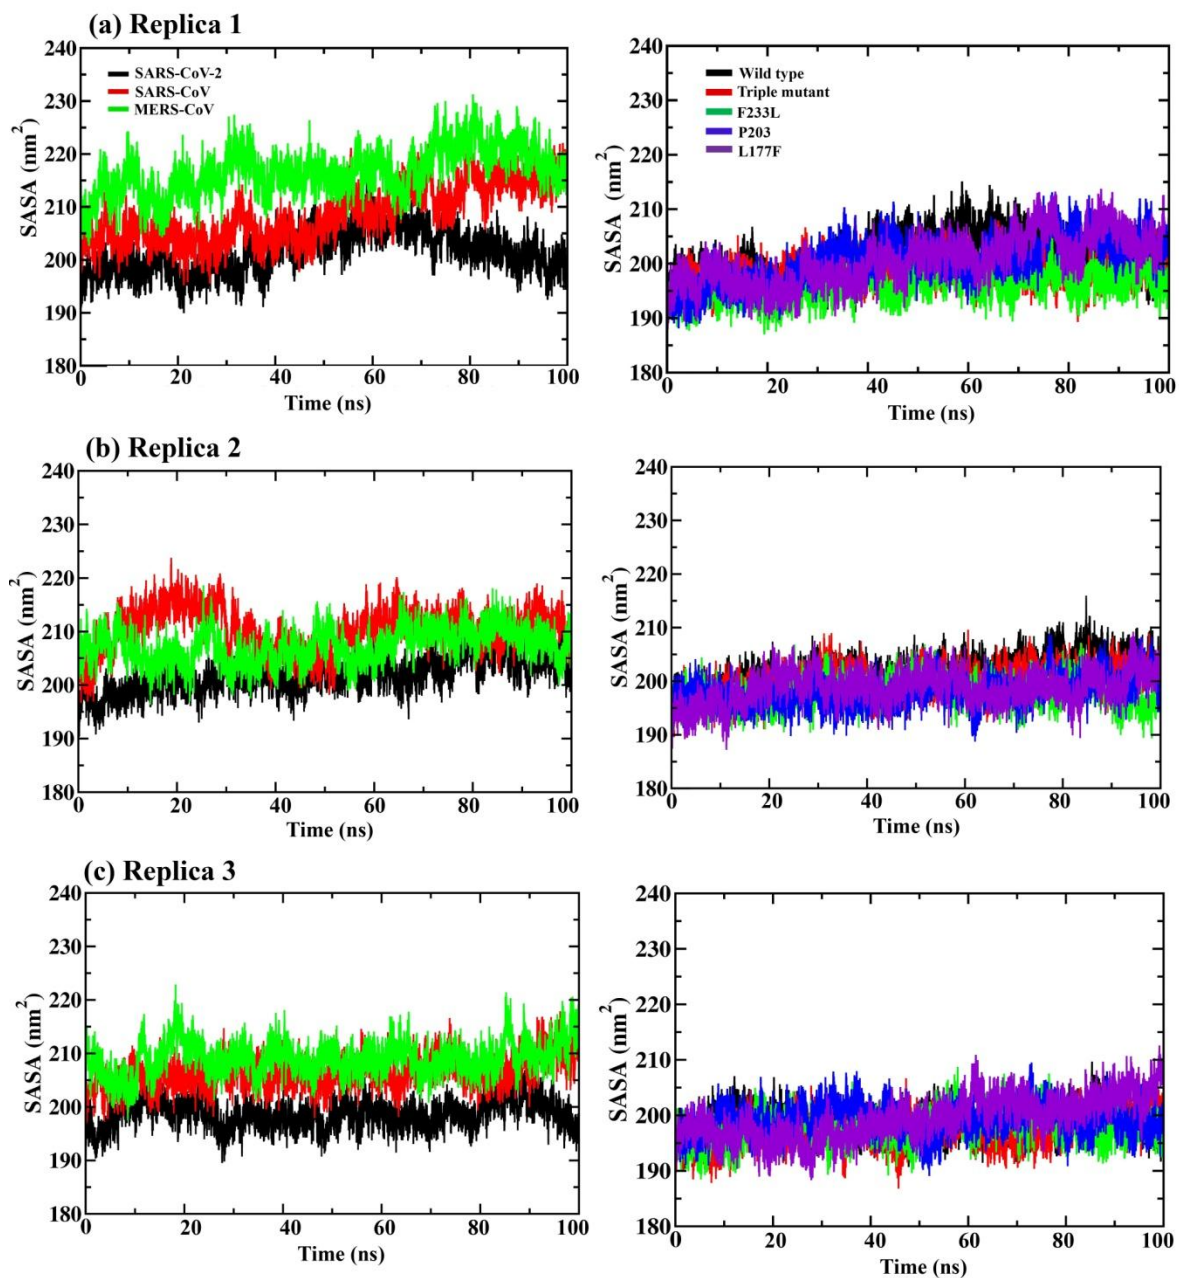

**Figure S8.** Solvent Accessible Surface Area (SASA) graphs of (a)-(c) SARS-CoV-2, SARS-CoV, MERS-CoV (left side) and SARS-CoV-2 NSP14<sup>mutant</sup> complexes (right side) along the three sets of 100 ns MD simulation.



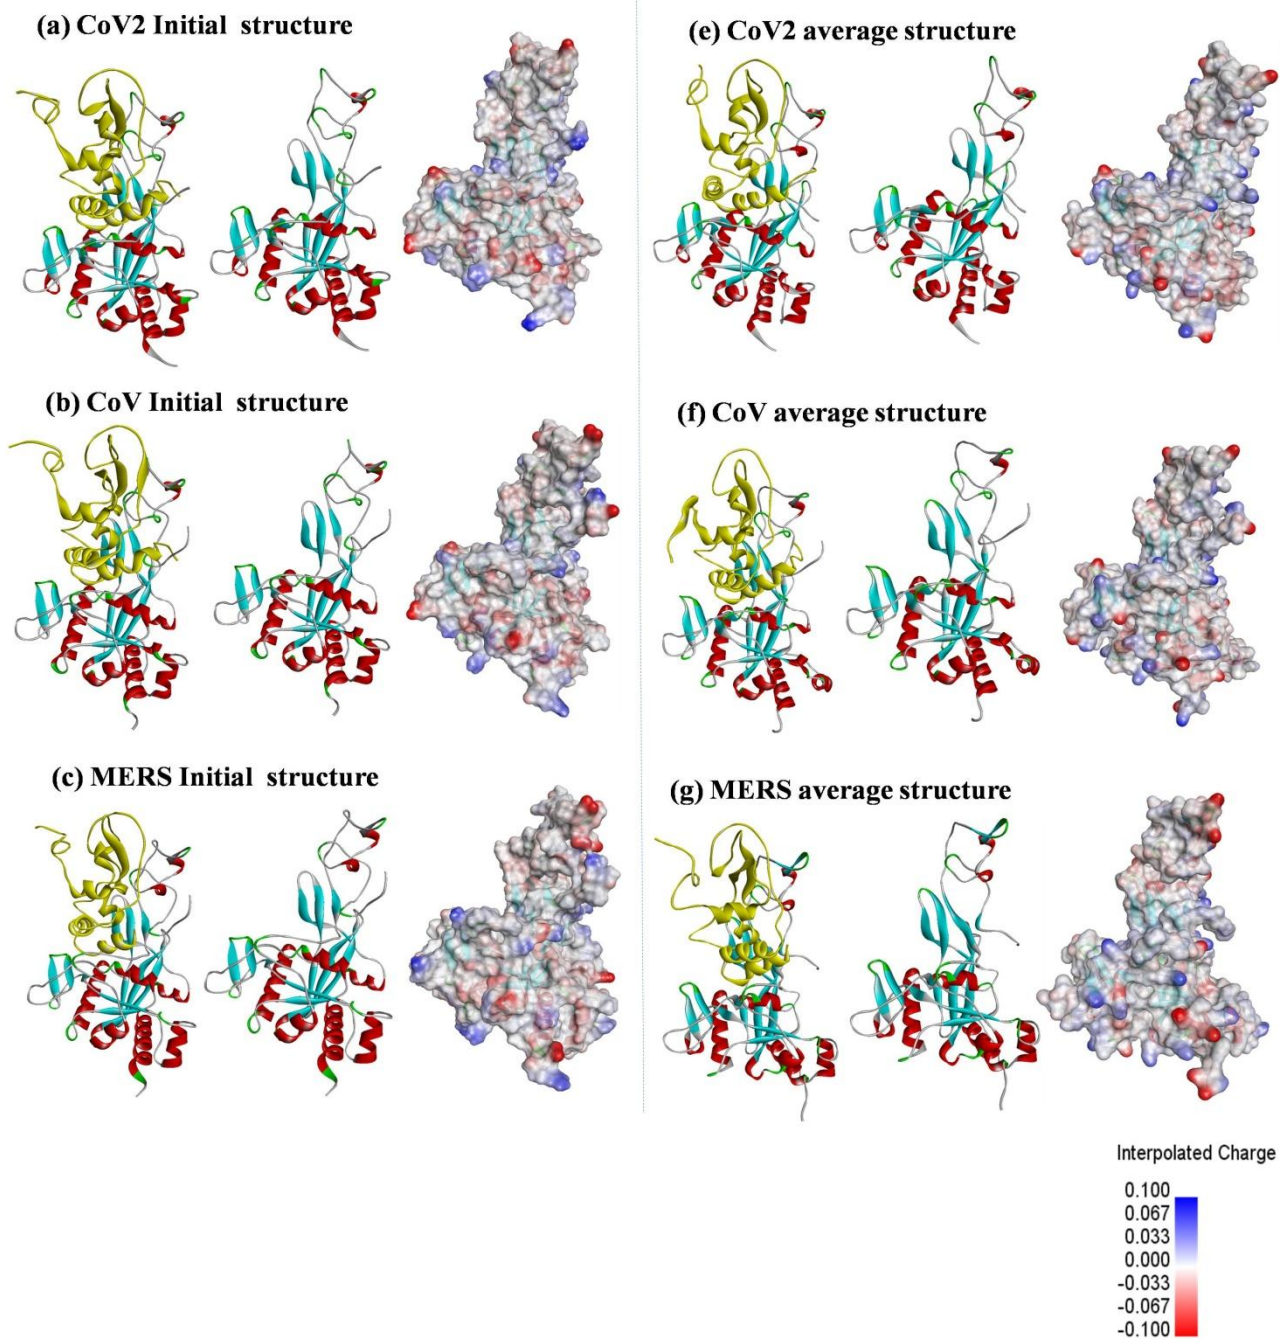

**Figure S9.** Comparison of the electrostatic surface and charge distribution of NSP14 initial (a)-(c) and average structure (extracted from last 20 ns) (e)-(g) of SARS-CoV-2, SARS-CoV and MERS-CoV. Three views are shown for each PPI complexes. NSP10 secondary structure is depicted in yellow and NSP14 presented in multicolor ribbon and electrostatic charge distribution depicting interface region of NSP14 is shown with positive (blue), negative (red) surface.

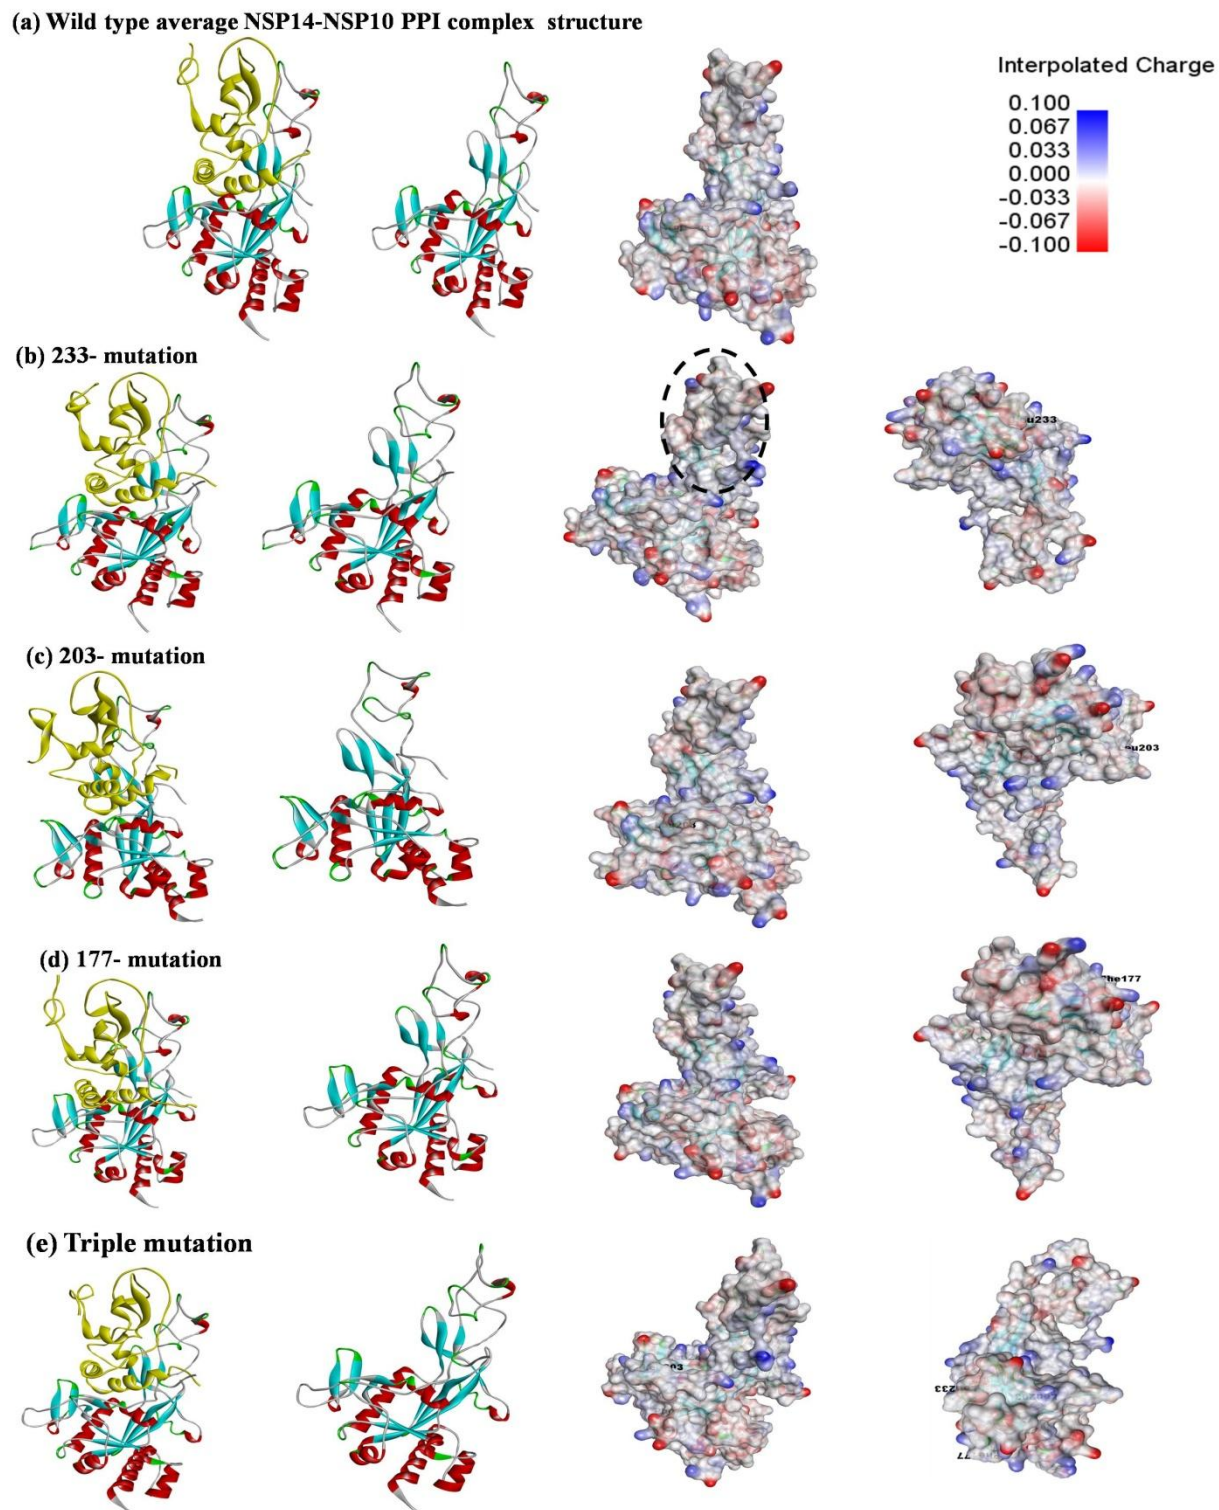

**Figure S10.** Electrostatic surfaces and charge distribution of the NSP14:comparison of the electrostatic surface of the average structure (extracted from last 20 ns) of wild type NSP14 (a) in comparison with different mutant structures (b)-(e). Three views are shown for each PPI complexes. The encircled area (b) in NSP14 (presented in multicolor as ribbon) is the binding interface region for NSP10 (NSP10 is depicted in yellow ribbon, extreme left side).

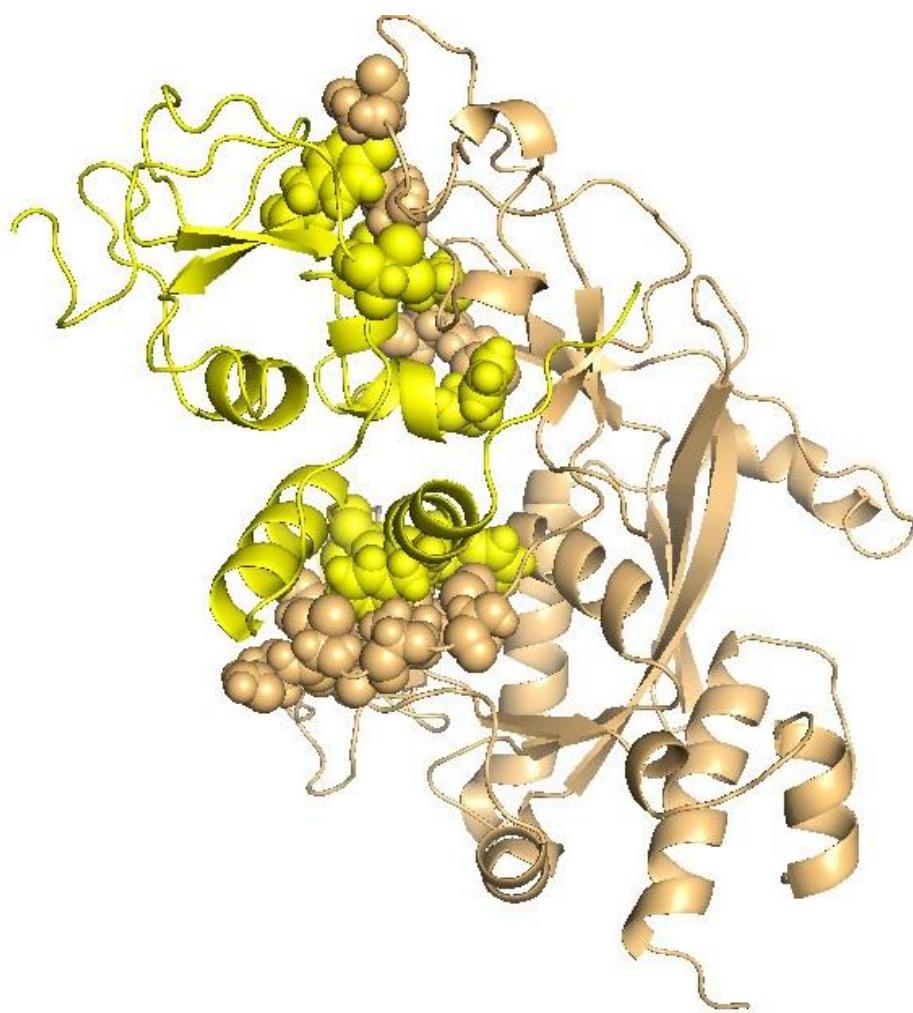

**Figure S11.** Cartoon view of the NSP14-NSP10 complex of SARS-CoV-2, common interacting interface hotspot residues among the three viruses (SARS-CoV-2, SARS-CoV and MERS-Co) represented in spheres. The NSP14 is represented in brown, NSP10 in yellow. Hotspot residues are represented in brown spheres (in NSP14), yellow spheres (in NSP10). The represented structure is the average conformer extracted from last 20 ns MD trajectory.

**Table S1.** PBC cubic box information for SARS-CoV-2, SARS-CoV and MERS-CoV

| PBC Box information           | SARS-CoV-2 |      |      | SARS-CoV |      |      | MERS-CoV |      |      |
|-------------------------------|------------|------|------|----------|------|------|----------|------|------|
|                               | x          | y    | z    | x        | y    | z    | x        | y    | z    |
| Box vectors/size (nm)         | 7.80       | 5.94 | 6.63 | 8.16     | 5.76 | 5.65 | 7.83     | 6.28 | 6.02 |
| Box volume (nm <sup>3</sup> ) | 279.28     |      |      | 265.63   |      |      | 292.33   |      |      |

**Table S2.** Comparison of interface statistics of the initial NSP14-NSP10 complexes (before MD) of SARS-CoV-2, SARS-CoV and MERS-CoV with the average complex structures extracted from last 20 ns from 100 ns MD trajectory of replica 1. For each complex, interface statistics obtained from PDBsum server.

| Human CoVs                          | Time                              | Protein chains PPI complexes | #Interface residues | Interface area (Å <sup>2</sup> ) | #Salt bridges | # H-bonds | # non-bonded contacts |
|-------------------------------------|-----------------------------------|------------------------------|---------------------|----------------------------------|---------------|-----------|-----------------------|
| SARS-CoV-2                          | Initial structure                 | NSP14 (A)                    | 50                  | 2135                             | 1             | 22        | 313                   |
|                                     |                                   | NSP10 (B)                    | 45                  | 2320                             |               |           |                       |
|                                     | Average structure from last 20 ns | <b>NSP14 (A)</b>             | <b>36</b>           | <b>1847</b>                      | <b>1</b>      | <b>12</b> | <b>171</b>            |
|                                     |                                   | <b>NSP10(B)</b>              | <b>35</b>           | <b>1994</b>                      |               |           |                       |
| SARS-CoV-2 <sup>F233L</sup>         | Average structure from last 20 ns | NSP14 (A)                    | 38                  | 1983                             | 1             | 17        | 165                   |
|                                     |                                   | NSP10(B)                     | 37                  | 2042                             |               |           |                       |
| SARS-CoV-2 <sup>P203L</sup>         | Average structure from last 20 ns | NSP14 (A)                    | 36                  | 1898                             | 1             | 13        | 162                   |
|                                     |                                   | NSP10(B)                     | 35                  | 1970                             |               |           |                       |
| SARS-CoV-2 <sup>L177F</sup>         | Average structure from last 20 ns | NSP14 (A)                    | 32                  | 1585                             | 1             | 10        | 125                   |
|                                     |                                   | NSP10(B)                     | 29                  | 1683                             |               |           |                       |
| SARS-CoV-2 <sup>Triple-mutant</sup> | Average structure from last 20 ns | NSP14 (A)                    | 39                  | 2036                             | 1             | 17        | 178                   |
|                                     |                                   |                              | NSP10(B)            | 40                               |               |           |                       |
| SARS-CoV                            | Initial structure                 | NSP14 (A)                    | 42                  | 2004                             | 1             | 14        | 217                   |
|                                     |                                   | NSP10 (B)                    | 39                  | 2182                             |               |           |                       |
|                                     | Average structure from last 20 ns | <b>NSP14 (A)</b>             | <b>39</b>           | <b>2062</b>                      | <b>1</b>      | <b>17</b> | <b>175</b>            |
|                                     |                                   | <b>NSP10 (B)</b>             | <b>39</b>           | <b>2026</b>                      |               |           |                       |
| MERS-CoV                            | Initial structure                 | NSP14 (A)                    | 42                  | 1797                             | 2             | 8         | 575                   |
|                                     |                                   | NSP10 (B)                    | 39                  | 1989                             |               |           |                       |
|                                     | Average structure from last 20 ns | <b>NSP14 (A)</b>             | <b>30</b>           | <b>1594</b>                      | <b>1</b>      | <b>10</b> | <b>125</b>            |
|                                     |                                   | <b>NSP10 (B)</b>             | <b>26</b>           | <b>1630</b>                      |               |           |                       |

**Table S3.** Comparison of interface statistics of the initial NSP14-NSP10 complexes (before MD) of SARS-CoV-2, SARS-CoV and MERS-CoV with the average complex structures extracted from last 20 ns from 100 ns MD trajectory of replica 2. For each complex, interface statistics obtained from PDBsum server.

| Human CoVs                          | Time                              | Protein chains PPI complexes | #Interface residues | Interface area (Å <sup>2</sup> ) | #Salt bridges | # H-bonds | # non-bonded contacts |
|-------------------------------------|-----------------------------------|------------------------------|---------------------|----------------------------------|---------------|-----------|-----------------------|
| SARS-CoV-2                          | Initial structure                 | NSP14 (A)                    | 50                  | 2135                             | 1             | 22        | 313                   |
|                                     |                                   | NSP10 (B)                    | 45                  | 2320                             |               |           |                       |
|                                     | Average structure from last 20 ns | <b>NSP14 (A)</b>             | <b>31</b>           | <b>1907</b>                      | <b>-</b>      | <b>19</b> | <b>162</b>            |
|                                     |                                   | <b>NSP10(B)</b>              | <b>32</b>           | <b>1994</b>                      |               |           |                       |
| SARS-CoV-2 <sup>F233L</sup>         |                                   | NSP14 (A)                    | 35                  | 1942                             | -             | 14        | 165                   |
| SARS-CoV-2 <sup>P203L</sup>         | Average structure from last 20 ns | NSP14 (A)                    | 42                  | 2016                             | 1             | 15        | 186                   |
|                                     |                                   | NSP10(B)                     | 35                  | 2126                             |               |           |                       |
| SARS-CoV-2 <sup>L177F</sup>         |                                   | NSP14 (A)                    | 38                  | 2020                             | 1             | 14        | 181                   |
|                                     |                                   | NSP10(B)                     | 37                  | 2113                             |               |           |                       |
| SARS-CoV-2 <sup>Triple-mutant</sup> |                                   | NSP14 (A)                    | 40                  | 2061                             | 1             | 16        | 178                   |
|                                     |                                   | NSP10(B)                     | 38                  | 2137                             |               |           |                       |
| SARS-CoV                            | Initial structure                 | NSP14 (A)                    | 42                  | 2004                             | 1             | 14        | 217                   |
|                                     |                                   | NSP10 (B)                    | 39                  | 2182                             |               |           |                       |
|                                     | Average structure from last 20 ns | <b>NSP14 (A)</b>             | <b>37</b>           | <b>1984</b>                      | <b>1</b>      | <b>17</b> | <b>166</b>            |
|                                     |                                   | <b>NSP10 (B)</b>             | <b>37</b>           | <b>1913</b>                      |               |           |                       |
| MERS-CoV                            | Initial structure                 | NSP14 (A)                    | 42                  | 1797                             | 2             | 8         | 575                   |
|                                     |                                   | NSP10 (B)                    | 39                  | 1989                             |               |           |                       |
|                                     | Average structure from last 20 ns | <b>NSP14 (A)</b>             | <b>28</b>           | <b>1689</b>                      | <b>1</b>      | <b>11</b> | <b>129</b>            |
|                                     |                                   | <b>NSP10 (B)</b>             | <b>31</b>           | <b>1690</b>                      |               |           |                       |

**Table S4.** Comparison of interface statistics of the initial NSP14-NSP10 complexes (before MD) of SARS-CoV-2, SARS-CoV and MERS-CoV with the average complex structures extracted from last 20 ns from 100 ns MD trajectory of replica 3. For each complex, interface statistics obtained from PDBsum server.

| Human CoV                           | Time                              | Protein chains PPI complexes | #Interface residues | Interface area (Å <sup>2</sup> ) | #Salt bridges | # H-bonds | # non-bonded contacts |
|-------------------------------------|-----------------------------------|------------------------------|---------------------|----------------------------------|---------------|-----------|-----------------------|
| SARS-CoV-2                          | Initial structure                 | NSP14 (A)                    | 50                  | 2135                             | 1             | 22        | 313                   |
|                                     |                                   | NSP10 (B)                    | 45                  | 2320                             |               |           |                       |
|                                     | Average structure from last 20 ns | <b>NSP14 (A)</b>             | <b>38</b>           | <b>1937</b>                      | -             | <b>13</b> | <b>156</b>            |
|                                     |                                   | <b>NSP10(B)</b>              | <b>34</b>           | <b>2042</b>                      |               |           |                       |
| SARS-CoV-2 <sup>F233L</sup>         | Average structure from last 20 ns | NSP14 (A)                    | 39                  | 1998                             | 1             | 17        | 174                   |
|                                     |                                   | NSP10(B)                     | 36                  | 2079                             |               |           |                       |
| SARS-CoV-2 <sup>P203L</sup>         | Average structure from last 20 ns | NSP14 (A)                    | 37                  | 1975                             | 1             | 13        | 151                   |
|                                     |                                   | NSP10(B)                     | 31                  | 2120                             |               |           |                       |
| SARS-CoV-2 <sup>L177F</sup>         | Average structure from last 20 ns | NSP14 (A)                    | 32                  | 1772                             | 1             | 8         | 127                   |
|                                     |                                   | NSP10(B)                     | 28                  | 1907                             |               |           |                       |
| SARS-CoV-2 <sup>Triple-mutant</sup> | Average structure from last 20 ns | NSP14 (A)                    | 39                  | 1993                             | 1             | 15        | 170                   |
| SARS-CoV                            | Initial structure                 | NSP14 (A)                    | 42                  | 2004                             | 1             | 14        | 217                   |
|                                     |                                   | NSP10 (B)                    | 39                  | 2182                             |               |           |                       |
|                                     | Average structure from last 20 ns | <b>NSP14 (A)</b>             | <b>36</b>           | <b>2074</b>                      | <b>1</b>      | <b>17</b> | <b>190</b>            |
|                                     |                                   | <b>NSP10 (B)</b>             | <b>42</b>           | <b>1972</b>                      |               |           |                       |
| MERS-CoV                            | Initial structure                 | NSP14 (A)                    | 42                  | 1797                             | 2             | 8         | 575                   |
|                                     |                                   | NSP10 (B)                    | 39                  | 1989                             |               |           |                       |
|                                     | Average structure from last 20 ns | <b>NSP14 (A)</b>             | <b>32</b>           | <b>1639</b>                      | <b>2</b>      | <b>11</b> | <b>140</b>            |
|                                     |                                   | <b>NSP10 (B)</b>             | <b>32</b>           | <b>1724</b>                      |               |           |                       |

**Table S5.** Total number of H-bond involved in the average conformer of SARS-CoV-2 NSP14-NSP10 complex extracted from last 20 ns MD trajectory of replica 1. The interface H-bond results obtained from PDBsum server.

| Sl. no. | Atom no. | Atom name | Res. Name | Res. no. | Atom Chain | Atom no. | Atom name | Res. Name | Res. no. | Atom Chain | Distance |
|---------|----------|-----------|-----------|----------|------------|----------|-----------|-----------|----------|------------|----------|
| 1       | 72       | O         | LEU       | 7        | A          | 4567     | N         | GLU       | 6        | B          | 3.28     |
| 2       | 123      | OD1       | ASP       | 10       | A          | 4510     | N         | ALA       | 1        | B          | 2.63     |
| 3       | 290      | O         | THR       | 21       | A          | 5833     | N         | GLY       | 94       | B          | 3.04     |
| 4       | 564      | O         | CYS       | 39       | A          | 5132     | N         | LEU       | 45       | B          | 2.88     |
| 5       | 589      | OD1       | ASP       | 41       | A          | 5317     | OG1       | THR       | 58       | B          | 2.69     |
| 6       | 590      | OD2       | ASP       | 41       | A          | 5875     | OH        | TYR       | 96       | B          | 2.72     |
| 7       | 910      | N         | LYS       | 61       | A          | 4703     | OG        | SER       | 15       | B          | 3.3      |
| 8       | 1017     | N         | ASN       | 67       | A          | 4970     | OG        | SER       | 33       | B          | 3.03     |
| 9       | 1051     | OH        | TYR       | 69       | A          | 4910     | OD2       | ASP       | 29       | B          | 2.67     |
| 10      | 1938     | O         | THR       | 127      | A          | 5827     | NZ        | LYS       | 93       | B          | 2.77     |
| 11      | 3154     | N         | ILE       | 201      | A          | 4767     | O         | PHE       | 19       | B          | 3.07     |
| 12      | 3172     | O         | ILE       | 201      | A          | 4778     | N         | VAL       | 21       | B          | 2.88     |



**Table S6.** Total number of H-bond involved in the average conformer of SARS-CoV-2 NSP14-NSP10 complex extracted from last 20 ns MD trajectory of replica 2. The interface H-bond results obtained from PDBsum server.

| Sl. no. | Atom no. | Atom name | Res. Name | Res. no. | Atom Chain | Atom no. | Atom name | Res. Name | Res. no. | Atom Chain | Distance |
|---------|----------|-----------|-----------|----------|------------|----------|-----------|-----------|----------|------------|----------|
| 1       | 54       | N         | LEU       | 7        | A          | 4581     | O         | GLU       | 6        | B          | 3.25     |
| 2       | 72       | O         | LEU       | 7        | A          | 4567     | N         | GLU       | 6        | B          | 3.05     |
| 3       | 92       | O         | PHE       | 8        | A          | 4553     | N         | THR       | 5        | B          | 3.07     |
| 4       | 92       | O         | PHE       | 8        | A          | 4559     | OG1       | THR       | 5        | B          | 2.78     |
| 5       | 115      | N         | ASP       | 10       | A          | 4542     | O         | ASN       | 3        | B          | 3.31     |
| 6       | 290      | O         | THR       | 21       | A          | 5833     | N         | GLY       | 94       | B          | 3.31     |
| 7       | 338      | OG1       | THR       | 25       | A          | 4566     | O         | THR       | 5        | B          | 2.67     |
| 8       | 346      | N         | HIS       | 26       | A          | 5065     | O         | ASN       | 40       | B          | 3.07     |
| 9       | 346      | N         | HIS       | 26       | A          | 5060     | OD1       | ASN       | 40       | B          | 3.06     |
| 10      | 363      | N         | LEU       | 27       | A          | 5060     | OD1       | ASN       | 40       | B          | 3.22     |
| 11      | 554      | N         | CYS       | 39       | A          | 5114     | O         | LYS       | 43       | B          | 2.98     |
| 12      | 564      | O         | CYS       | 39       | A          | 5132     | N         | LEU       | 45       | B          | 2.81     |
| 13      | 910      | N         | LYS       | 61       | A          | 4703     | OG        | SER       | 15       | B          | 2.96     |
| 14      | 1017     | N         | ASN       | 67       | A          | 4970     | OG        | SER       | 33       | B          | 2.97     |
| 15      | 1051     | OH        | TYR       | 69       | A          | 4910     | OD2       | ASP       | 29       | B          | 2.88     |
| 16      | 1976     | ND2       | ASN       | 130      | A          | 5748     | O         | GLY       | 88       | B          | 2.90     |
| 17      | 1987     | OG1       | THR       | 131      | A          | 5620     | ND1       | HIS       | 80       | B          | 3.00     |
| 18      | 3154     | N         | ILE       | 201      | A          | 4767     | O         | PHE       | 19       | B          | 3.06     |
| 19      | 3172     | O         | ILE       | 201      | A          | 4778     | N         | VAL       | 21       | B          | 2.99     |

**Table S7.** Total number of H-bond involved in the average conformer of SARS-CoV-2 NSP14-NSP10 complex extracted from last 20 ns MD trajectory of replica 3. The interface H-bond results obtained from PDBsum server.

| Sl. no. | Atom no. | Atom name | Res. Name | Res. no. | Atom Chain | Atom no. | Atom name | Res. Name | Res. no. | Atom Chain | Distance |
|---------|----------|-----------|-----------|----------|------------|----------|-----------|-----------|----------|------------|----------|
| 1       | 33       | N         | THR       | 5        | A          | 4581     | O         | GLU       | 6        | B          | 2.85     |
| 2       | 115      | N         | ASP       | 10       | A          | 4542     | O         | ASN       | 3        | B          | 2.93     |
| 3       | 126      | O         | ASP       | 10       | A          | 4529     | N         | ASN       | 3        | B          | 2.86     |
| 4       | 331      | O         | PRO       | 24       | A          | 5501     | OG        | SER       | 72       | B          | 2.68     |
| 5       | 338      | OG1       | THR       | 25       | A          | 4566     | O         | THR       | 5        | B          | 2.87     |
| 6       | 346      | N         | HIS       | 26       | A          | 5065     | O         | ASN       | 40       | B          | 2.98     |
| 7       | 554      | N         | CYS       | 39       | A          | 5114     | O         | LYS       | 43       | B          | 2.94     |
| 8       | 564      | O         | CYS       | 39       | A          | 5132     | N         | LEU       | 45       | B          | 2.82     |
| 9       | 910      | N         | LYS       | 61       | A          | 4703     | OG        | SER       | 15       | B          | 3.03     |
| 10      | 1017     | N         | ASN       | 67       | A          | 4970     | OG        | SER       | 33       | B          | 3.09     |
| 11      | 1051     | OH        | TYR       | 69       | A          | 4910     | OD2       | ASP       | 29       | B          | 2.67     |
| 12      | 3154     | N         | ILE       | 201      | A          | 4767     | O         | PHE       | 19       | B          | 2.94     |
| 13      | 3172     | O         | ILE5      | 201      | A          | 4778     | N         | VAL       | 21       | B          | 2.82     |

**Table S8.** Total number of H-bond involved in the average conformer of SARS-CoV NSP14-NSP10 complex extracted from last 20 ns MD trajectory of replica 1. The interface H-bond results obtained from PDBsum server.

| Sl. no. | Atom no. | Atom name | Res. Name | Res. no. | Chain NSP14 | Atom no. | Atom name | Res. Name | Res. no. | Chain NSP10 | Distance |
|---------|----------|-----------|-----------|----------|-------------|----------|-----------|-----------|----------|-------------|----------|
| 1       | 2246     | OG1       | THR       | 25       | A           | 57       | O         | THR       | 5        | B           | 2.84     |
| 2       | 1951     | O         | THR       | 5        | A           | 58       | N         | GLU       | 6        | B           | 3.26     |
| 3       | 1938     | N         | THR       | 5        | A           | 72       | O         | GLU       | 6        | B           | 2.79     |
| 4       | 2844     | O         | LYS       | 61       | A           | 194      | OG        | SER       | 15       | B           | 2.81     |
| 5       | 5065     | N         | ILE       | 201      | A           | 258      | O         | PHE       | 19       | B           | 2.94     |
| 6       | 5083     | O         | ILE       | 201      | A           | 269      | N         | VAL       | 21       | B           | 2.89     |
| 7       | 2964     | OH        | TYR       | 69       | A           | 405      | OD2       | ASP       | 29       | B           | 2.69     |
| 8       | 2930     | N         | ASN       | 67       | A           | 465      | OG        | SER       | 33       | B           | 3.1      |
| 9       | 2254     | N         | HIS       | 26       | A           | 560      | O         | ASN       | 40       | B           | 3.06     |
| 10      | 2467     | N         | CYS       | 39       | A           | 609      | O         | LYS       | 43       | B           | 2.88     |
| 11      | 2477     | O         | CYS       | 39       | A           | 627      | N         | LEU       | 45       | B           | 2.8      |
| 12      | 2503     | OD2       | ASP       | 41       | A           | 812      | OG1       | THR       | 58       | B           | 2.77     |
| 13      | 3877     | O         | ASN       | 129      | A           | 1264     | N         | CYS       | 90       | B           | 2.87     |
| 14      | 3831     | OD1       | ASP       | 126      | A           | 1322     | NZ        | LYS       | 93       | B           | 2.64     |
| 15      | 3848     | O         | THR       | 127      | A           | 1322     | NZ        | LYS       | 93       | B           | 2.75     |
| 16      | 2198     | O         | THR       | 21       | A           | 1328     | N         | GLY       | 94       | B           | 3        |
| 17      | 2502     | OD1       | ASP       | 41       | A           | 1370     | OH        | TYR       | 96       | B           | 2.66     |

**Table S9.** Total number of H-bond involved in the average conformer of SARS-CoV NSP14-NSP10 complex extracted from last 20 ns MD trajectory of replica 2. The interface H-bond results obtained from PDBsum server.

| Sl. no. | Atom no. | Atom name | Res. Name | Res. no. | Atom Chain | Atom no. | Atom name | Res. Name | Res. no. | Atom Chain | Distance |
|---------|----------|-----------|-----------|----------|------------|----------|-----------|-----------|----------|------------|----------|
| 1       | 57       | O         | THR       | 5        | A          | 2245     | OG1       | THR       |          | B          | 2.81     |
| 2       | 72       | O         | GLU       | 6        | A          | 1937     | N         | THR       |          | B          | 2.88     |
| 3       | 194      | OG        | SER       | 15       | A          | 2888     | OH        | TYR       |          | B          | 3.17     |
| 4       | 258      | O         | PHE       | 19       | A          | 5064     | N         | ILE       |          | B          | 2.96     |
| 5       | 269      | N         | VAL       | 21       | A          | 5082     | O         | ILE       |          | B          | 3.00     |
| 6       | 405      | OD2       | ASP       | 29       | A          | 2963     | OH        | TYR       |          | B          | 2.66     |
| 7       | 465      | OG        | SER       | 33       | A          | 2929     | N         | ASN       |          | B          | 2.96     |
| 8       | 560      | O         | ASN       | 40       | A          | 2253     | N         | HIS       |          | B          | 2.88     |
| 9       | 609      | O         | LYS       | 43       | A          | 2466     | N         | CYS       |          | B          | 3.21     |
| 10      | 627      | N         | LEU       | 45       | A          | 2476     | O         | CYS       |          | B          | 2.80     |
| 11      | 979      | N         | ALA       | 71       | A          | 2197     | O         | THR       |          | B          | 3.02     |
| 12      | 996      | OG        | SER       | 72       | A          | 2238     | O         | PRO       |          | B          | 2.77     |
| 13      | 1264     | N         | CYS       | 90       | A          | 3876     | O         | ASN       |          | B          | 2.84     |
| 14      | 1322     | NZ        | LYS       | 93       | A          | 3830     | OD1       | ASP       |          | B          | 2.89     |
| 15      | 1322     | NZ        | LYS       | 93       | A          | 3847     | O         | THR       |          | B          | 2.78     |
| 16      | 1322     | NZ        | LYS       | 93       | A          | 3890     | O         | ASN       |          | B          | 3.09     |
| 17      | 1328     | N         | GLY       | 94       | A          | 2209     | OE1       | GLN       |          | B          | 2.86     |

**Table S10.** Total number of H-bond involved in the average conformer of SARS-CoV NSP14-NSP10 complex extracted from last 20 ns MD trajectory of replica 3. The interface H-bond results obtained from PDBsum server.

| Sl. no. | Atom no. | Atom name | Res. Name | Res. no. | Atom Chain | Atom no. | Atom name | Res. Name | Res. no. | Atom Chain | Distance |
|---------|----------|-----------|-----------|----------|------------|----------|-----------|-----------|----------|------------|----------|
| 1       | 2028     | OD2       | ASP       | 10       | A          | 1        | N         | ALA       | 1        | B          | 2.54     |
| 2       | 2019     | N         | ASP       | 10       | A          | 33       | O         | ASN       | 3        | B          | 2.93     |
| 3       | 1996     | O         | PHE       | 8        | A          | 44       | N         | THR       | 5        | B          | 2.90     |
| 4       | 2245     | OG1       | THR       | 25       | A          | 57       | O         | THR       | 5        | B          | 2.67     |
| 5       | 5064     | N         | ILE       | 201      | A          | 258      | O         | PHE       | 19       | B          | 3.09     |
| 6       | 5082     | O         | ILE       | 201      | A          | 269      | N         | VAL       | 21       | B          | 2.84     |
| 7       | 2963     | OH        | TYR       | 69       | A          | 405      | OD2       | ASP       | 29       | B          | 2.68     |
| 8       | 2929     | N         | ASN       | 67       | A          | 465      | OG        | SER       | 33       | B          | 3.07     |
| 9       | 2253     | N         | HIS       | 26       | A          | 560      | O         | ASN       | 40       | B          | 3.03     |
| 10      | 2466     | N         | CYS       | 39       | A          | 609      | O         | LYS       | 43       | B          | 2.90     |
| 11      | 2476     | O         | CYS       | 39       | A          | 627      | N         | LEU       | 45       | B          | 2.80     |
| 12      | 2197     | O         | THR       | 21       | A          | 979      | N         | ALA       | 71       | B          | 3.24     |
| 13      | 2238     | O         | PRO       | 24       | A          | 996      | OG        | SER       | 72       | B          | 2.69     |
| 14      | 3891     | N         | THR       | 131      | A          | 1243     | O         | GLY       | 88       | B          | 3.19     |
| 15      | 3830     | OD1       | ASP       | 126      | A          | 1322     | NZ        | LYS       | 93       | B          | 2.65     |
| 16      | 3847     | O         | THR       | 127      | A          | 1322     | NZ        | LYS       | 93       | B          | 2.81     |
| 17      | 2209     | OE1       | GLN       | 22       | A          | 1328     | N         | GLY       | 94       | B          | 2.90     |

**Table S11.** Total number of H-bond involved in the average conformer of MERS-CoV NSP14-NSP10 complex extracted from last 20 ns MD trajectory of replica 1. The interface H-bond results obtained from PDBsum server.

| Sl. no. | Atom no. | Atom name | Res. Name | Res. no. | Atom Chain | Atom no. | Atom name | Res. Name | Res. no. | Atom Chain | Distance |
|---------|----------|-----------|-----------|----------|------------|----------|-----------|-----------|----------|------------|----------|
| 1       | 306      | O         | ALA       | 21       | A          | 5697     | N         | GLY       | 94       | B          | 3.07     |
| 2       | 366      | N         | TYR       | 26       | A          | 4912     | O         | ASN       | 40       | B          | 2.97     |
| 3       | 590      | N         | CYS       | 40       | A          | 4961     | O         | LYS       | 43       | B          | 2.95     |
| 4       | 600      | O         | CYS       | 40       | A          | 4979     | N         | LEU       | 45       | B          | 2.8      |
| 5       | 921      | N         | LYS       | 61       | A          | 4538     | OG        | SER       | 15       | B          | 3.09     |
| 6       | 1919     | OD2       | ASP       | 126      | A          | 5691     | NZ        | LYS       | 93       | B          | 2.54     |
| 7       | 1935     | O         | THR       | 127      | A          | 5691     | NZ        | LYS       | 93       | B          | 2.82     |
| 8       | 1974     | O         | TRP       | 129      | A          | 5621     | N         | CYS       | 90       | B          | 2.9      |
| 9       | 1991     | ND2       | ASN       | 131      | A          | 5484     | ND1       | HIS       | 80       | B          | 3.04     |
| 10      | 3097     | N         | ILE       | 201      | A          | 4610     | O         | PHE       | 19       | B          | 2.94     |

**Table S12.** Total number of H-bond involved in the average conformer of MERS-CoV NSP14-NSP10 complex extracted from last 20 ns MD trajectory of replica 2. The interface H-bond results obtained from PDBsum server.

| Sl. no. | Atom no. | Atom name | Res. Name | Res. no. | Atom Chain | Atom no. | Atom name | Res. Name | Res. no. | Atom Chain | Distance |
|---------|----------|-----------|-----------|----------|------------|----------|-----------|-----------|----------|------------|----------|
| 1       | 306      | O         | ALA       | 21       | A          | 5697     | N         | GLY       | 94       | B          | 2.99     |
| 2       | 379      | OH        | TYR       | 26       | A          | 4940     | N         | LYS       | 43       | B          | 3.03     |
| 3       | 590      | N         | CYS       | 40       | A          | 4961     | O         | LYS       | 43       | B          | 3.03     |
| 4       | 600      | O         | CYS       | 40       | A          | 4979     | N         | LEU       | 45       | B          | 2.81     |
| 5       | 921      | N         | LYS       | 61       | A          | 4538     | OG        | SER       | 15       | B          | 3.13     |
| 6       | 1048     | OH        | TYR       | 69       | A          | 4765     | OD2       | ASP       | 29       | B          | 2.65     |
| 7       | 1974     | O         | TRP       | 129      | A          | 5621     | N         | CYS       | 90       | B          | 2.83     |
| 8       | 1990     | OD1       | ASN       | 131      | A          | 5539     | NE2       | HIS       | 83       | B          | 2.84     |
| 9       | 1991     | ND2       | ASN       | 131      | A          | 5512     | O         | ILE       | 81       | B          | 2.95     |
| 10      | 3097     | N         | ILE       | 201      | A          | 4610     | O         | PHE       | 19       | B          | 2.84     |
| 11      | 3115     | O         | ILE       | 201      | A          | 4625     | N         | VAL       | 21       | B          | 2.86     |

**Table S13.** Total number of H-bond involved in the average conformer of MERS-CoV NSP14-NSP10 complex extracted from last 20 ns MD trajectory of replica 3. The interface H-bond results obtained from PDBsum server.

| Sl. no. | Atom no. | Atom name | Res. Name | Res. no. | Atom Chain | Atom no. | Atom name | Res. Name | Res. no. | Atom Chain | Distance |
|---------|----------|-----------|-----------|----------|------------|----------|-----------|-----------|----------|------------|----------|
| 1       | 306      | O         | ALA       | 21       | A          | 5697     | N         | GLY       | 94       | B          | 3.10     |
| 2       | 590      | N         | CYS       | 40       | A          | 4961     | O         | LYS       | 43       | B          | 3.23     |
| 3       | 600      | O         | CYS       | 40       | A          | 4979     | N         | LEU       | 45       | B          | 2.83     |
| 4       | 869      | NH1       | ARG       | 57       | A          | 5476     | O         | ALA       | 79       | B          | 3.19     |
| 5       | 921      | N         | LYS       | 61       | A          | 4538     | OG        | SER       | 15       | B          | 2.91     |
| 6       | 1935     | O         | THR       | 127      | A          | 5691     | NZ        | LYS       | 93       | B          | 2.80     |
| 7       | 1974     | O         | TRP       | 129      | A          | 5621     | N         | CYS       | 90       | B          | 3.03     |
| 8       | 1981     | O         | GLY       | 130      | A          | 5691     | NZ        | LYS       | 93       | B          | 3.02     |
| 9       | 1991     | ND2       | ASN       | 131      | A          | 5512     | O         | ILE       | 81       | B          | 3.00     |
| 10      | 3097     | N         | ILE       | 201      | A          | 4610     | O         | PHE       | 19       | B          | 3.15     |
| 11      | 3115     | O         | ILE       | 201      | A          | 4625     | N         | VAL       | 21       | B          | 2.92     |



**Table S14.** Total number of H-bond involved in the average conformer of SARS-CoV-2 NSP14<sup>L177F</sup> mutant complex extracted from last 20 ns MD trajectory of replica 1. The interface H-bond results obtained from PDBsum server.

| Sl No. | Atom no. | Atom name | Res. name | Res no. | Chain NSP12 | Atom no. | Atom name | Res. name | Res no. | Chain NSP8 | Distance |
|--------|----------|-----------|-----------|---------|-------------|----------|-----------|-----------|---------|------------|----------|
| 1      | 290      | O         | THR       | 21      | A           | 5834     | N         | GLY       | 94      | B          | 3.08     |
| 2      | 564      | O         | CYS       | 39      | A           | 5133     | N         | LEU       | 45      | B          | 2.83     |
| 3      | 910      | N         | LYS       | 61      | A           | 4704     | OG        | SER       | 15      | B          | 3.04     |
| 4      | 1017     | N         | ASN       | 67      | A           | 4971     | OG        | SER       | 33      | B          | 2.99     |
| 5      | 1051     | OH        | TYR       | 69      | A           | 4911     | OD2       | ASP       | 29      | B          | 2.67     |
| 6      | 1922     | OD2       | ASP       | 126     | A           | 5828     | NZ        | LYS       | 93      | B          | 2.77     |
| 7      | 1938     | O         | THR       | 127     | A           | 5828     | NZ        | LYS       | 93      | B          | 2.77     |
| 8      | 1966     | O         | ASN       | 129     | A           | 5770     | N         | CYS       | 90      | B          | 2.94     |
| 9      | 3155     | N         | ILE       | 201     | A           | 4768     | O         | PHE       | 19      | B          | 3.05     |
| 10     | 3173     | O         | ILE       | 201     | A           | 4779     | N         | VAL       | 21      | B          | 2.82     |

**Table S15.** Total number of H-bond involved in the average conformer of SARS-CoV-2 NSP14<sup>L177F</sup> mutant complex extracted from last 20 ns MD trajectory of replica 2. The interface H-bond results obtained from PDBsum server.

| Sl. no. | Atom no. | Atom name | Res. Name | Res. no. | Atom Chain | Atom no. | Atom name | Res. Name | Res. no. | Atom Chain | Distance |
|---------|----------|-----------|-----------|----------|------------|----------|-----------|-----------|----------|------------|----------|
| 1       | 33       | N         | THR       | 5        | A          | 4582     | O         | GLU       | 6        | B          | 2.86     |
| 2       | 115      | N         | ASP       | 10       | A          | 4543     | O         | ASN       | 3        | B          | 2.89     |
| 3       | 126      | O         | ASP       | 10       | A          | 4530     | N         | ASN       | 3        | B          | 2.92     |
| 4       | 564      | O         | CYS       | 39       | A          | 5133     | N         | LEU       | 45       | B          | 2.86     |
| 5       | 589      | OD1       | ASP       | 41       | A          | 5318     | OG1       | THR       | 58       | B          | 3.03     |
| 6       | 590      | OD2       | ASP       | 41       | A          | 5876     | OH        | TYR       | 96       | B          | 3.10     |
| 7       | 910      | N         | LYS       | 61       | A          | 4704     | OG        | SER       | 15       | B          | 3.06     |
| 8       | 1017     | N         | ASN       | 67       | A          | 4971     | OG        | SER       | 33       | B          | 2.94     |
| 9       | 1051     | OH        | TYR       | 69       | A          | 4910     | OD1       | ASP       | 29       | B          | 2.96     |
| 10      | 1922     | OD2       | ASP       | 126      | A          | 5828     | NZ        | LYS       | 93       | B          | 2.89     |
| 11      | 1966     | O         | ASN       | 129      | A          | 5770     | N         | CYS       | 90       | B          | 2.97     |
| 12      | 1962     | ND2       | ASN       | 129      | A          | 5833     | O         | LYS       | 93       | B          | 3.22     |
| 13      | 3155     | N         | ILE       | 201      | A          | 4768     | O         | PHE       | 19       | B          | 3.06     |
| 14      | 3173     | O         | ILE       | 201      | A          | 4779     | N         | VAL       | 21       | B          | 3.00     |

**Table S16.** Total number of H-bond involved in the average conformer of SARS-CoV-2 NSP14<sup>L177F</sup> mutant complex extracted from last 20 ns MD trajectory of replica 3. The interface H-bond results obtained from PDBsum server.

| Sl. no. | Atom no. | Atom name | Res. Name | Res. no. | Atom Chain | Atom no. | Atom name | Res. Name | Res. no. | Atom Chain | Distance |
|---------|----------|-----------|-----------|----------|------------|----------|-----------|-----------|----------|------------|----------|
| 1       | 338      | OG1       | THR       | 25       | A          | 4567     | O         | THR       | 5        | B          | 2.80     |
| 2       | 346      | N         | HIS       | 26       | A          | 5061     | OD1       | ASN       | 40       | B          | 2.95     |
| 3       | 554      | N         | CYS       | 39       | A          | 5115     | O         | LYS       | 43       | B          | 3.16     |
| 4       | 564      | O         | CYS       | 39       | A          | 5133     | N         | LEU       | 45       | B          | 2.79     |
| 5       | 910      | N         | LYS       | 61       | A          | 4704     | OG        | SER       | 15       | B          | 3.00     |
| 6       | 1017     | N         | ASN       | 67       | A          | 4971     | OG        | SER       | 33       | B          | 2.93     |
| 7       | 3155     | N         | ILE       | 201      | A          | 4768     | O         | PHE       | 19       | B          | 3.07     |
| 8       | 3173     | O         | ILE       | 201      | A          | 4779     | N         | VAL       | 21       | B          | 2.91     |

**Table S17.** Total number of H-bond involved in the average conformer of SARS-CoV-2 NSP14<sup>P230L</sup> mutant complex extracted from last 20 ns MD trajectory of replica 1. The interface H-bond results obtained from PDBsum server.

| Sl. No | Atom no. | Atom name | Res. name | Res no. | Chain NSP14 | Atom no. | Atom name | Res. name | Res no. | Chain NSP10 | Distance |
|--------|----------|-----------|-----------|---------|-------------|----------|-----------|-----------|---------|-------------|----------|
| 1      | 290      | O         | THR       | 21      | A           | 5838     | N         | GLY       | 94      | B           | 3.07     |
| 2      | 331      | O         | PRO       | 24      | A           | 5506     | OG        | SER       | 72      | B           | 2.71     |
| 3      | 338      | OG1       | THR       | 25      | A           | 4571     | O         | THR       | 5       | B           | 2.73     |
| 4      | 346      | N         | HIS       | 26      | A           | 5070     | O         | ASN       | 40      | B           | 2.97     |
| 5      | 554      | N         | CYS       | 39      | A           | 5119     | O         | LYS       | 43      | B           | 3.05     |
| 6      | 564      | O         | CYS       | 39      | A           | 5137     | N         | LEU       | 45      | B           | 2.81     |
| 7      | 590      | OD2       | ASP       | 41      | A           | 5880     | OH        | TYR       | 96      | B           | 3.2      |
| 8      | 910      | N         | LYS       | 61      | A           | 4708     | OG        | SER       | 15      | B           | 3.06     |
| 9      | 1017     | N         | ASN       | 67      | A           | 4975     | OG        | SER       | 33      | B           | 2.96     |
| 10     | 1051     | OH        | TYR       | 69      | A           | 4915     | OD2       | ASP       | 29      | B           | 2.65     |
| 11     | 1966     | O         | ASN       | 129     | A           | 5774     | N         | CYS       | 90      | B           | 3.02     |
| 12     | 3154     | N         | ILE       | 201     | A           | 4772     | O         | PHE       | 19      | B           | 3.08     |
| 13     | 3172     | O         | ILE       | 201     | A           | 4783     | N         | VAL       | 21      | B           | 2.94     |

**Table S18.** Total number of H-bond involved in the average conformer of SARS-CoV-2 NSP14<sup>P230L</sup> mutant complex extracted from last 20 ns MD trajectory of replica 2. The interface H-bond results obtained from PDBsum server

| Sl. no. | Atom no. | Atom name | Res. Name | Res. no. | Atom Chain | Atom no. | Atom name | Res. Name | Res. no. | Atom Chain | Distance |
|---------|----------|-----------|-----------|----------|------------|----------|-----------|-----------|----------|------------|----------|
| 1       | 33       | N         | THR       | 5        | A          | 4586     | O         | GLU       | 6        | B          | 2.84     |
| 2       | 115      | N         | ASP       | 10       | A          | 4547     | O         | ASN       | 3        | B          | 3.01     |
| 3       | 126      | O         | ASP       | 10       | A          | 4534     | N         | ASN       | 3        | B          | 2.96     |
| 4       | 290      | O         | THR       | 21       | A          | 5838     | N         | GLY       | 94       | B          | 3.19     |
| 5       | 338      | OG1       | THR       | 25       | A          | 4571     | O         | THR       | 5        | B          | 2.73     |
| 6       | 346      | N         | HIS       | 26       | A          | 5070     | O         | ASN       | 40       | B          | 3.10     |
| 7       | 353      | ND1       | HIS       | 26       | A          | 5098     | N         | LYS       | 43       | B          | 3.33     |
| 8       | 554      | N         | CYS       | 39       | A          | 5119     | O         | LYS       | 43       | B          | 2.88     |
| 9       | 564      | O         | CYS       | 39       | A          | 5137     | N         | LEU       | 45       | B          | 2.79     |
| 10      | 590      | OD2       | ASP       | 41       | A          | 5880     | OH        | TYR       | 96       | B          | 2.94     |
| 11      | 910      | N         | LYS       | 61       | A          | 4708     | OG        | SER       | 15       | B          | 3.03     |
| 12      | 1017     | N         | ASN       | 67       | A          | 4975     | OG        | SER       | 33       | B          | 3.03     |
| 13      | 1051     | OH        | TYR       | 69       | A          | 4915     | OD2       | ASP       | 29       | B          | 2.65     |
| 14      | 3154     | N         | ILE       | 201      | A          | 4772     | O         | PHE       | 19       | B          | 2.97     |
| 15      | 3172     | O         | ILE       | 201      | A          | 4783     | N         | VAL       | 21       | B          | 2.86     |

**Table S19.** Total number of H-bond involved in the average conformer of SARS-CoV-2 NSP14<sup>P230L</sup> mutant complex extracted from last 20 ns MD trajectory of replica 3. The interface H-bond results obtained from PDBsum server

| Sl. no. | Atom no. | Atom name | Res. Name | Res. no. | Atom Chain | Atom no. | Atom name | Res. Name | Res. no. | Atom Chain | Distance |
|---------|----------|-----------|-----------|----------|------------|----------|-----------|-----------|----------|------------|----------|
| 1       | 33       | N         | THR       | 5        | A          | 4586     | O         | GLU       | 6        | B          | 2.84     |
| 2       | 115      | N         | ASP       | 10       | A          | 4547     | O         | ASN       | 3        | B          | 2.96     |
| 3       | 126      | O         | ASP       | 10       | A          | 4534     | N         | ASN       | 3        | B          | 2.83     |
| 4       | 290      | O         | THR       | 21       | A          | 5838     | N         | GLY       | 94       | B          | 3.09     |
| 5       | 338      | OG1       | THR       | 25       | A          | 4564     | OG1       | THR       | 5        | B          | 2.78     |
| 6       | 389      | OG        | SER       | 28       | A          | 4564     | OG1       | THR       | 5        | B          | 2.83     |
| 7       | 564      | O         | CYS       | 39       | A          | 5137     | N         | LEU       | 45       | B          | 2.92     |
| 8       | 589      | OD1       | ASP       | 41       | A          | 5880     | OH        | TYR       | 96       | B          | 2.93     |
| 9       | 910      | N         | LYS       | 61       | A          | 4708     | OG        | SER       | 15       | B          | 3.00     |
| 10      | 1051     | OH        | TYR       | 69       | A          | 4914     | OD1       | ASP       | 29       | B          | 2.66     |
| 11      | 1922     | OD2       | ASP       | 126      | A          | 5832     | NZ        | LYS       | 93       | B          | 2.71     |
| 12      | 3154     | N         | ILE       | 201      | A          | 4772     | O         | PHE       | 19       | B          | 3.02     |
| 13      | 3172     | O         | ILE       | 201      | A          | 4783     | N         | VAL       | 21       | B          | 3.20     |

**Table S20.** Total number of H-bond involved in the average conformer of SARS-CoV-2 NSP14<sup>F233L</sup> mutant complex extracted from last 20 ns MD trajectory of replica 1. The interface H-bond results obtained from PDBsum server.

| Sl No. | Atom no. | Atom name | Res. name | Res no. | Chain NSP14 | Atom no. | Atom name | Res. name | Res no. | Chain NSP10 | Distance |
|--------|----------|-----------|-----------|---------|-------------|----------|-----------|-----------|---------|-------------|----------|
| 1      | 33       | N         | THR       | 5       | A           | 4580     | O         | GLU       | 6       | B           | 2.89     |
| 2      | 115      | N         | ASP       | 10      | A           | 4541     | O         | ASN       | 3       | B           | 3.16     |
| 3      | 126      | O         | ASP       | 10      | A           | 4528     | N         | ASN       | 3       | B           | 3.3      |
| 4      | 290      | O         | THR       | 21      | A           | 5832     | N         | GLY       | 94      | B           | 3.11     |
| 5      | 331      | O         | PRO       | 24      | A           | 5500     | OG        | SER       | 72      | B           | 2.72     |
| 6      | 338      | OG1       | THR       | 25      | A           | 4565     | O         | THR       | 5       | B           | 2.89     |
| 7      | 346      | N         | HIS       | 26      | A           | 5064     | O         | ASN       | 40      | B           | 3.04     |
| 8      | 554      | N         | CYS       | 39      | A           | 5113     | O         | LYS       | 43      | B           | 3.11     |
| 9      | 564      | O         | CYS       | 39      | A           | 5131     | N         | LEU       | 45      | B           | 2.82     |
| 10     | 589      | OD1       | ASP       | 41      | A           | 5316     | OG1       | THR       | 58      | B           | 3.26     |
| 11     | 590      | OD2       | ASP       | 41      | A           | 5874     | OH        | TYR       | 96      | B           | 3.16     |
| 12     | 910      | N         | LYS       | 61      | A           | 4702     | OG        | SER       | 15      | B           | 3.00     |
| 13     | 1017     | N         | ASN       | 67      | A           | 4969     | OG        | SER       | 33      | B           | 3.00     |
| 14     | 1051     | OH        | TYR       | 69      | A           | 4909     | OD2       | ASP       | 29      | B           | 2.67     |
| 15     | 1921     | OD1       | ASP       | 126     | A           | 5826     | NZ        | LYS       | 93      | B           | 2.69     |
| 16     | 3154     | N         | ILE       | 201     | A           | 4766     | O         | PHE       | 19      | B           | 3.03     |
| 17     | 3172     | O         | ILE       | 201     | A           | 4777     | N         | VAL       | 21      | B           | 2.93     |

**Table S21.** Total number of H-bond involved in the average conformer of SARS-CoV-2 NSP14<sup>F233L</sup> mutant complex extracted from last 20 ns MD trajectory of replica 2. The interface H-bond results obtained from PDBsum server.

| Sl. no. | Atom no. | Atom name | Res. Name | Res. no. | Atom Chain | Atom no. | Atom name | Res. Name | Res. no. | Atom Chain | Distance |
|---------|----------|-----------|-----------|----------|------------|----------|-----------|-----------|----------|------------|----------|
| 1       | 33       | N         | THR       | 5        | A          | 4580     | O         | GLU       | 6        | B          | 3.09     |
| 2       | 92       | O         | PHE       | 8        | A          | 4558     | OG1       | THR       | 5        | B          | 2.83     |
| 3       | 115      | N         | ASP       | 10       | A          | 4541     | O         | ASN       | 3        | B          | 2.91     |
| 4       | 331      | O         | PRO       | 24       | A          | 5500     | OG        | SER       | 72       | B          | 2.71     |
| 5       | 338      | OG1       | THR       | 25       | A          | 4565     | O         | THR       | 5        | B          | 2.68     |
| 6       | 346      | N         | HIS       | 26       | A          | 5064     | O         | ASN       | 40       | B          | 2.90     |
| 7       | 363      | N         | LEU       | 27       | A          | 5059     | OD1       | ASN       | 40       | B          | 3.29     |
| 8       | 554      | N         | CYS       | 39       | A          | 5113     | O         | LYS       | 43       | B          | 2.88     |
| 9       | 564      | O         | CYS       | 39       | A          | 5131     | N         | LEU       | 45       | B          | 2.83     |
| 10      | 910      | N         | LYS       | 61       | A          | 4702     | OG        | SER       | 15       | B          | 3.01     |
| 11      | 1017     | N         | ASN       | 67       | A          | 4969     | OG        | SER       | 33       | B          | 3.04     |
| 12      | 1051     | OH        | TYR       | 69       | A          | 4908     | OD1       | ASP       | 29       | B          | 2.66     |
| 13      | 3154     | N         | ILE       | 201      | A          | 4766     | O         | PHE       | 19       | B          | 2.97     |
| 14      | 3172     | O         | ILE       | 201      | A          | 4777     | N         | VAL       | 21       | B          | 2.82     |



**Table S22.** Total number of H-bond involved in the average conformer of SARS-CoV-2 NSP14<sup>F233L</sup> mutant complex extracted from last 20 ns MD trajectory of replica 3. The interface H-bond results obtained from PDBsum server.

| Sl no. | Atom no. | Atom name | Res name | Res no. | Atom Chain | Atom no. | Atom name | Res. name | Res. no. | Atom Chain | Distance |
|--------|----------|-----------|----------|---------|------------|----------|-----------|-----------|----------|------------|----------|
| 1.     | 33       | N         | THR      | 5       | A          | 4580     | O         | GLU       | 6        | B          | 3.04     |
| 2.     | 115      | N         | ASP      | 10      | A          | 4541     | O         | ASN       | 3        | B          | 2.94     |
| 3.     | 126      | O         | ASP      | 10      | A          | 4528     | N         | ASN       | 3        | B          | 2.84     |
| 4.     | 290      | O         | THR      | 21      | A          | 5832     | N         | GLY       | 94       | B          | 3.11     |
| 5.     | 338      | OG1       | THR      | 25      | A          | 4565     | O         | THR       | 5        | B          | 2.73     |
| 6.     | 346      | N         | HIS      | 26      | A          | 5059     | OD1       | ASN       | 40       | B          | 3.26     |
| 7.     | 554      | N         | CYS      | 39      | A          | 5113     | O         | LYS       | 43       | B          | 3.21     |
| 8.     | 564      | O         | CYS      | 39      | A          | 5131     | N         | LEU       | 45       | B          | 2.91     |
| 9.     | 590      | OD2       | ASP      | 41      | A          | 5874     | OH        | TYR       | 96       | B          | 3.07     |
| 10.    | 910      | N         | LYS      | 61      | A          | 4702     | OG        | SER       | 15       | B          | 3.09     |
| 11.    | 1017     | N         | ASN      | 67      | A          | 4969     | OG        | SER       | 33       | B          | 3.00     |
| 12.    | 1051     | OH        | TYR      | 69      | A          | 4909     | OD2       | ASP       | 29       | B          | 2.71     |
| 13.    | 1921     | OD1       | ASP      | 126     | A          | 5826     | NZ        | LYS       | 93       | B          | 2.90     |
| 14.    | 1922     | OD2       | ASP      | 126     | A          | 5826     | NZ        | LYS       | 93       | B          | 2.81     |
| 15.    | 1966     | O         | ASN      | 129     | A          | 5768     | N         | CYS       | 90       | B          | 2.88     |
| 16.    | 3154     | N         | ILE      | 201     | A          | 4766     | O         | PHE       | 19       | B          | 3.03     |
| 17.    | 3172     | O         | ILE      | 201     | A          | 4777     | N         | VAL       | 21       | B          | 2.92     |

**Table S23.** Total number of H-bond involved in the average conformer of SARS-CoV-2 NSP14<sup>Triple</sup> mutant complex extracted from last 20 ns MD trajectory of replica 1. The interface H-bond results obtained from PDBsum server.

| Sl No. | Atom no. | Atom name | Res. name | Res no. | Chain NSP12 | Atom no. | Atom name | Res. name | Res no. | Chain NSP8 | Distance |
|--------|----------|-----------|-----------|---------|-------------|----------|-----------|-----------|---------|------------|----------|
| 1      | 33       | N         | THR       | 5       | A           | 4586     | O         | GLU       | 6       | B          | 2.91     |
| 2      | 92       | O         | PHE       | 8       | A           | 4564     | OG1       | THR       | 5       | B          | 3.18     |
| 3      | 115      | N         | ASP       | 10      | A           | 4547     | O         | ASN       | 3       | B          | 2.88     |
| 4      | 126      | O         | ASP       | 10      | A           | 4534     | N         | ASN       | 3       | B          | 2.9      |
| 5      | 290      | O         | THR       | 21      | A           | 5838     | N         | GLY       | 94      | B          | 3.13     |
| 6      | 331      | O         | PRO       | 24      | A           | 5506     | OG        | SER       | 72      | B          | 2.7      |
| 7      | 338      | OG1       | THR       | 25      | A           | 4571     | O         | THR       | 5       | B          | 2.72     |
| 8      | 346      | N         | HIS       | 26      | A           | 5070     | O         | ASN       | 40      | B          | 3        |
| 9      | 554      | N         | CYS       | 39      | A           | 5119     | O         | LYS       | 43      | B          | 3.1      |
| 10     | 564      | O         | CYS       | 39      | A           | 5137     | N         | LEU       | 45      | B          | 2.85     |
| 11     | 910      | N         | LYS       | 61      | A           | 4708     | OG        | SER       | 15      | B          | 2.98     |
| 12     | 1017     | N         | ASN       | 67      | A           | 4975     | OG        | SER       | 33      | B          | 2.99     |
| 13     | 1051     | OH        | TYR       | 69      | A           | 4914     | OD1       | ASP       | 29      | B          | 2.67     |
| 14     | 1922     | OD2       | ASP       | 126     | A           | 5832     | NZ        | LYS       | 93      | B          | 2.89     |
| 15     | 1976     | ND2       | ASN       | 130     | A           | 5753     | O         | GLY       | 88      | B          | 2.95     |
| 16     | 3155     | N         | ILE       | 201     | A           | 4772     | O         | PHE       | 19      | B          | 3.01     |
| 17     | 3173     | O         | ILE       | 201     | A           | 4783     | N         | VAL       | 21      | B          | 2.86     |

**Table S24.**Total number of H-bond involved in the average conformer of SARS-CoV-2 NSP14<sup>Triple</sup> mutant complex extracted from last 20 ns MD trajectory of replica 2. The interface H-bond results obtained from PDBsum server.

| Sl. no. | Atom no. | Atom name | Res. Name | Res. no. | Atom Chain | Atom no. | Atom name | Res. Name | Res. no. | Atom Chain | Distance |
|---------|----------|-----------|-----------|----------|------------|----------|-----------|-----------|----------|------------|----------|
| 1       | 33       | N         | THR       | 5        | A          | 4586     | O         | GLU       | 6        | B          | 2.93     |
| 2       | 92       | O         | PHE       | 8        | A          | 4564     | OG1       | THR       | 5        | B          | 3.27     |
| 3       | 115      | N         | ASP       | 10       | A          | 4547     | O         | ASN       | 3        | B          | 2.92     |
| 4       | 126      | O         | ASP       | 10       | A          | 4534     | N         | ASN       | 3        | B          | 2.85     |
| 5       | 290      | O         | THR       | 21       | A          | 5838     | N         | GLY       | 94       | B          | 3.24     |
| 6       | 338      | OG1       | THR       | 25       | A          | 4571     | O         | THR       | 5        | B          | 2.76     |
| 7       | 346      | N         | HIS       | 26       | A          | 5070     | O         | ASN       | 40       | B          | 2.98     |
| 8       | 564      | O         | CYS       | 39       | A          | 5137     | N         | LEU       | 45       | B          | 2.82     |
| 9       | 589      | OD1       | ASP       | 41       | A          | 5322     | OG1       | THR       | 58       | B          | 2.63     |
| 10      | 590      | OD2       | ASP       | 41       | A          | 5880     | OH        | TYR       | 96       | B          | 2.69     |
| 11      | 910      | N         | LYS       | 61       | A          | 4708     | OG        | SER       | 15       | B          | 3.04     |
| 12      | 1017     | N         | ASN       | 67       | A          | 4975     | OG        | SER       | 33       | B          | 3.04     |
| 13      | 1051     | OH        | TYR       | 69       | A          | 4915     | OD2       | ASP       | 29       | B          | 2.67     |
| 14      | 1922     | OD2       | ASP       | 126      | A          | 5832     | NZ        | LYS       | 93       | B          | 2.69     |
| 15      | 3155     | N         | ILE       | 201      | A          | 4772     | O         | PHE       | 19       | B          | 2.93     |
| 16      | 3173     | O         | ILE       | 201      | A          | 4783     | N         | VAL       | 21       | B          | 2.85     |

**Table S25.** Total number of H-bond involved in the average conformer of SARS-CoV-2 NSP14<sup>Triple</sup> mutant complex extracted from last 20 ns MD trajectory of replica 3. The interface H-bond results obtained from PDBsum server.

| Sl no. | Atom no. | Atom name | Res name | Res no. | Atom Chain | Atom no. | Atom name | Res. name | Res. no. | Atom Chain | Distance |
|--------|----------|-----------|----------|---------|------------|----------|-----------|-----------|----------|------------|----------|
| 1.     | 33       | N         | THR      | 5       | A          | 4586     | O         | GLU       | 6        | B          | 2.89     |
| 2.     | 115      | N         | ASP      | 10      | A          | 4547     | O         | ASN       | 3        | B          | 2.92     |
| 3.     | 126      | O         | ASP      | 10      | A          | 4534     | N         | ASN       | 3        | B          | 2.82     |
| 4.     | 290      | O         | THR      | 21      | A          | 5838     | N         | GLY       | 94       | B          | 3.29     |
| 5.     | 338      | OG1       | THR      | 25      | A          | 4571     | O         | THR       | 5        | B          | 2.72     |
| 6.     | 346      | N         | HIS      | 26      | A          | 5065     | OD1       | ASN       | 40       | B          | 2.99     |
| 7.     | 363      | N         | LEU      | 27      | A          | 5065     | OD1       | ASN       | 40       | B          | 3.30     |
| 8.     | 554      | N         | CYS      | 39      | A          | 5119     | O         | LYS       | 43       | B          | 2.93     |
| 9.     | 564      | O         | CYS      | 39      | A          | 5137     | N         | LEU       | 45       | B          | 2.80     |
| 10.    | 910      | N         | LYS      | 61      | A          | 4708     | OG        | SER       | 15       | B          | 3.02     |
| 11.    | 1017     | N         | ASN      | 67      | A          | 4975     | OG        | SER       | 33       | B          | 2.98     |
| 12.    | 1051     | OH        | TYR      | 69      | A          | 4914     | OD1       | ASP       | 29       | B          | 2.65     |
| 13.    | 1922     | OD2       | ASP      | 126     | A          | 5832     | NZ        | LYS       | 93       | B          | 2.64     |
| 14.    | 3155     | N         | ILE      | 201     | A          | 4772     | O         | PHE       | 19       | B          | 3.00     |
| 15.    | 3173     | O         | ILE      | 201     | A          | 4783     | N         | VAL       | 21       | B          | 2.96     |

**Table S26.** Total number of H-bond involved in the initial structure (before MD) of SARS-CoV-2 NSP14-NSP10 PPI complex interface obtained from PDBsum server

| Sl. no. | Atom no. | Atom name | Res. Name | Res. no. | Atom Chain | Atom no. | Atom name | Res. Name | Res. no. | Atom Chain | Distance |
|---------|----------|-----------|-----------|----------|------------|----------|-----------|-----------|----------|------------|----------|
| 1       | 16       | N         | THR       | 5        | A          | 2337     | O         | GLU       | 6        | M          | 3.04     |
| 2       | 38       | O         | PHE       | 8        | A          | 2332     | OG1       | THR       | 5        | M          | 2.76     |
| 3       | 54       | NZ        | LYS       | 9        | A          | 2308     | O         | ALA       | 1        | M          | 2.79     |
| 4       | 55       | N         | ASP       | 10       | A          | 2317     | O         | ASN       | 3        | M          | 2.82     |
| 5       | 58       | O         | ASP       | 10       | A          | 2314     | N         | ASN       | 3        | M          | 2.84     |
| 6       | 146      | O         | THR       | 21       | A          | 2988     | N         | GLY       | 94       | M          | 2.84     |
| 7       | 176      | OG1       | THR       | 25       | A          | 2330     | O         | THR       | 5        | M          | 2.64     |
| 8       | 178      | N         | HIS       | 26       | A          | 2590     | O         | ASN       | 40       | M          | 2.94     |
| 9       | 281      | N         | CYS       | 39       | A          | 2611     | O         | LYS       | 43       | M          | 3.06     |
| 10      | 284      | O         | CYS       | 39       | A          | 2625     | N         | LEU       | 45       | M          | 2.75     |
| 11      | 300      | OD1       | ASP       | 41       | A          | 3012     | OH        | TYR       | 96       | M          | 2.6      |
| 12      | 463      | N         | LYS       | 61       | A          | 2403     | OG        | SER       | 15       | M          | 2.94     |
| 13      | 486      | OD1       | ASN       | 63       | A          | 2381     | OG1       | THR       | 12       | M          | 2.63     |
| 14      | 516      | N         | ASN       | 67       | A          | 2547     | OG        | SER       | 33       | M          | 2.82     |
| 15      | 539      | OH        | TYR       | 69       | A          | 2516     | OD2       | ASP       | 29       | M          | 2.61     |
| 16      | 984      | OD1       | ASP       | 126      | A          | 2881     | ND1       | HIS       | 80       | M          | 2.81     |
| 17      | 989      | O         | THR       | 127      | A          | 2987     | NZ        | LYS       | 93       | M          | 2.48     |
| 18      | 1008     | N         | ASN       | 130      | A          | 2945     | O         | GLY       | 88       | M          | 3.17     |
| 19      | 1015     | ND2       | ASN       | 130      | A          | 2907     | ND1       | HIS       | 83       | M          | 2.85     |
| 20      | 1558     | NZ        | LYS       | 196      | A          | 2424     | O         | ALA       | 18       | M          | 2.9      |
| 21      | 1598     | N         | ILE       | 201      | A          | 2429     | O         | PHE       | 19       | M          | 2.93     |
| 22      | 1601     | O         | ILE       | 201      | A          | 2442     | N         | VAL       | 21       | M          | 2.92     |

**Table S27.** Total number of H-bond involved in the initial structure (before MD) of SARS-CoV NSP14-NSP10 PPI complex interface obtained from PDBsum server

| Sl. no. | Atom no. | Atom name | Res. Name | Res. no. | Atom Chain | Atom no. | Atom name | Res. Name | Res. no. | Atom Chain | Distance |
|---------|----------|-----------|-----------|----------|------------|----------|-----------|-----------|----------|------------|----------|
| 1       | 1028     | NZ        | LYS       | 9        | A          | 4        | O         | ALA       | 1        | B          | 2.54     |
| 2       | 1032     | O         | ASP       | 10       | A          | 10       | N         | ASN       | 3        | B          | 3.06     |
| 3       | 1029     | N         | ASP       | 10       | A          | 13       | O         | ASN       | 3        | B          | 2.86     |
| 4       | 1143     | OG1       | THR       | 25       | A          | 26       | O         | THR       | 5        | B          | 3.05     |
| 5       | 990      | N         | THR       | 5        | A          | 33       | O         | GLU       | 6        | B          | 2.63     |
| 6       | 1415     | O         | PHE       | 60       | A          | 99       | OG        | SER       | 15       | B          | 2.85     |
| 7       | 2543     | N         | ILE       | 201      | A          | 125      | O         | PHE       | 19       | B          | 3.14     |
| 8       | 2546     | O         | ILE       | 201      | A          | 138      | N         | VAL       | 21       | B          | 2.89     |
| 9       | 1145     | N         | HIS       | 26       | A          | 281      | O         | ASN       | 40       | B          | 3.19     |
| 10      | 1249     | N         | CYS       | 39       | A          | 302      | O         | LYS       | 43       | B          | 3.04     |
| 11      | 1935     | OD1       | ASP       | 126      | A          | 572      | ND1       | HIS       | 80       | B          | 2.66     |
| 12      | 1956     | O         | ASN       | 129      | A          | 648      | N         | CYS       | 90       | B          | 3.34     |
| 13      | 1347     | OH        | TYR       | 51       | A          | 678      | NZ        | LYS       | 93       | B          | 2.96     |
| 14      | 1940     | O         | THR       | 127      | A          | 678      | NZ        | LYS       | 93       | B          | 2.65     |

**Table S28.** Total number of H-bond involved in the initial structure (before MD) of MERS-CoV NSP14-NSP10 PPI complex interface obtained from PDBsum server

| Sl. no. | Atom no. | Atom name | Res. Name | Res. no. | Atom Chain | Atom no. | Atom name | Res. Name | Res. no. | Atom Chain | Distance |
|---------|----------|-----------|-----------|----------|------------|----------|-----------|-----------|----------|------------|----------|
| 1       | 164      | OH        | TYR       | 22       | A          | 2886     | O         | LYS       | 93       | B          | 3.16     |
| 2       | 182      | OG1       | THR       | 25       | A          | 2500     | O         | ASN       | 40       | B          | 3.23     |
| 3       | 303      | O         | CYS       | 40       | A          | 2535     | N         | LEU       | 45       | B          | 3.2      |
| 4       | 390      | OH        | TYR       | 51       | A          | 2891     | NZ        | LYS       | 93       | B          | 1.75     |
| 5       | 451      | O         | GLY       | 59       | A          | 2289     | OG        | SER       | 11       | B          | 3.3      |
| 6       | 984      | O         | TRP       | 129      | A          | 2860     | N         | CYS       | 90       | B          | 2.98     |
| 7       | 1559     | O         | ILE       | 201      | A          | 2356     | OG1       | THR       | 20       | B          | 2.73     |
| 8       | 1576     | NZ        | LYS       | 203      | A          | 2430     | OD2       | ASP       | 29       | B          | 3.23     |

**Table S29.** Salt bridge involved in the initial structure (before MD) of SARS-CoV-2, SARS-CoV and MERS-CoV of NSP14-NSP10 PPI complex. The salt bridges atom-atom interaction at PPI interface obtained from PDBsum server

|           | <b>Atom no.</b> | <b>Atom name</b> | <b>Res. Name</b> | <b>Res. no.</b> | <b>Atom Chain</b> |  | <b>Atom no.</b> | <b>Atom name</b> | <b>Res. Name</b> | <b>Res. no.</b> | <b>Atom Chain</b> | <b>Distance</b> |
|-----------|-----------------|------------------|------------------|-----------------|-------------------|--|-----------------|------------------|------------------|-----------------|-------------------|-----------------|
| SARSCoV-2 | 984             | OD1              | ASP              | 126             | A                 |  | 2881            | ND1              | HIS              | 80              | B                 | 2.81            |
| SARS-CoV  | 1935            | OD1              | ASP              | 126             | A                 |  | 572             | ND1              | HIS              | 80              | B                 | 2.66            |
| MERS-CoV  | 963             | OD1              | ASP              | 126             | A                 |  | 2793            | NE2              | HIS              | 80              | B                 | 3.13            |
|           | 1576            | NZ               | LYS              | 203             | A                 |  | 2430            | OD2              | ASP              | 29              | B                 | 3.23            |



**Table S30.** Salt bridge involved in the average conformer (from last 20 ns trajectory) of SARS-CoV-2, SARS-CoV and MERS-CoV NSP14-NSP10 complex extracted from last 20 ns MD trajectory from all the three sets of MD simulations. The salt bridge atom-atom interactions across protein-protein interface results are obtained from PDBsum server. In SARS-CoV-2 MD simulation replica 2 and 3, and SARS-CoV-2<sup>F233L</sup> replica 2 does not form salt bridges.

| Coronaviruses                              | Atom no.       | Atom name | Res. Name | Res. no. | Atom Chain |  | Atom no. | Atom name | Res. Name | Res. no. | Atom Chain | Distance |
|--------------------------------------------|----------------|-----------|-----------|----------|------------|--|----------|-----------|-----------|----------|------------|----------|
| SARS-CoV-2 replica1                        | 1921           | OD1       | ASP       | 126      | A          |  | 5827     | NZ        | LYS       | 93       | B          | 3.2      |
| SARS-CoV- replica 1                        | 3831           | OD1       | ASP       | 126      | A          |  | 1322     | NZ        | LYS       | 93       | B          | 2.64     |
| SARS-CoV replica 2                         | 1322           | NZ        | LYS       | 93       | A          |  | 3830     | OD1       | ASP       | 126      | B          | 2.89     |
| SARS-CoV replica 3                         | 3830           | OD1       | ASP       | 126      | A          |  | 1322     | NZ        | LYS       | 93       | B          | 2.65     |
| MERS-CoV replica 1                         | 1919           | OD2       | ASP       | 126      | A          |  | 5691     | NZ        | LYS       | 93       | B          | 2.54     |
| MERS-CoV replica 2                         | 1918           | OD1       | ASP       | 126      | A          |  | 5691     | NZ        | LYS       | 93       | B          | 2.98     |
| MERS-CoV replica 3                         | 1919           | OD2       | ASP       | 126      | A          |  | 5488     | NE2       | HIS       | 80       | B          | 3.50     |
|                                            | 1918           | OD2       | ASP       | 126      | A          |  | 5691     | NZ        | LYS       | 93       | B          | 3.22     |
|                                            |                |           |           |          |            |  |          |           |           |          |            |          |
| SARS-CoV-2 <sup>L177F</sup> replica 1      | 1922           | OD2       | ASP       | 126      | A          |  | 5832     | NZ        | LYS       | 93       | B          | 3.05     |
| SARS-CoV-2 <sup>F233L</sup> replica 1      | 1921           | OD1       | ASP       | 126      | A          |  | 5826     | NZ        | LYS       | 93       | B          | 2.69     |
| SARS-CoV-2 <sup>P203L</sup> replica 1      | 1922           | OD2       | ASP       | 126      | A          |  | 5828     | NZ        | LYS       | 93       | B          | 2.77     |
| SARS-CoV-2 <sup>Triple mut</sup> replica 1 | 1922           | OD2       | ASP       | 126      | A          |  | 5832     | NZ        | LYS       | 93       | B          | 2.89     |
|                                            |                |           |           |          |            |  |          |           |           |          |            |          |
| SARS-CoV-2 <sup>L177F</sup> replica 2      | 1922           | OD2       | ASP       | 126      | A          |  | 5828     | NZ        | LYS       | 93       | B          | 2.89     |
| SARS-CoV-2 <sup>F233L</sup> replica 2      | No salt bridge |           |           |          |            |  |          |           |           |          |            |          |
| SARS-CoV-2 <sup>P203L</sup> replica 2      | 1921           | OD2       | ASP       | 126      | A          |  | 5832     | NZ        | LYS       | 93       | B          | 3.02     |
| SARS-CoV-2 <sup>Triple mut</sup> replica 2 | 1922           | OD2       | ASP       | 126      | A          |  | 5832     | NZ        | LYS       | 93       | B          | 2.69     |
|                                            |                |           |           |          |            |  |          |           |           |          |            |          |
| SARS-CoV-2 <sup>L177F</sup> replica 3      | 1922           | OD2       | ASP       | 126      | A          |  | 5828     | NZ        | LYS       | 93       | B          | 3.23     |
| SARS-CoV-2 <sup>F233L</sup> replica 3      | 1922           | OD2       | ASP       | 126      | A          |  | 5826     | NZ        | LYS       | 93       | B          | 2.81     |
| SARS-CoV-2 <sup>P203L</sup> replica 3      | 1922           | OD2       | ASP       | 126      | A          |  | 5832     | NZ        | LYS       | 93       | B          | 2.71     |
| SARS-CoV-2 <sup>Triple-mut</sup> replica 3 | 1922           | OD2       | ASP       | 126      | A          |  | 5832     | NZ        | LYS       | 93       | B          | 2.64     |

**Table S31.** List of interacting residues at protein-protein interacting interface of SARS-CoV-2 NSP14 (Chain A) and NSP10 (Chain B), interface hotspot residues are predicted using three computational methods implemented in KFC, DrugScore<sup>PPI</sup> and Robetta web server. The per-residue energy decomposition analysis was carried out using the last 20 ns MD trajectory.

| <b>Residues</b> | <b>KFC</b> | <b>Robetta<br/><math>\Delta\Delta G</math> (kcal/mol)</b> | <b>DrugScore PPI<br/><math>\Delta\Delta G</math> (kcal/mol)</b> | <b>Per-residue energy<br/>contribution (kJ/mol)</b> |
|-----------------|------------|-----------------------------------------------------------|-----------------------------------------------------------------|-----------------------------------------------------|
| GLY-6 A         |            |                                                           |                                                                 | -0.89                                               |
| <b>LEU-7A</b>   | <b>HS</b>  | 0.71                                                      | 0.65                                                            | -6.5                                                |
| PHE-8A          | HS         | 2.88                                                      | 1.08                                                            | -15.76                                              |
| <b>ASP-10A</b>  |            |                                                           | 2.02                                                            | -3.97                                               |
| SER-12A         |            |                                                           |                                                                 | -2.93                                               |
| VAL-14A         |            |                                                           |                                                                 | -1.62                                               |
| HIS-19A         |            | 0.86                                                      |                                                                 | -4.03                                               |
| PRO-20A         | HS         |                                                           |                                                                 | -3.58                                               |
| <b>THR-21A</b>  | HS         | 1.16                                                      | 0.54                                                            | -9.06                                               |
| GLN-22A         | HS         |                                                           | 0.02                                                            | -2.67                                               |
| ALA-23A         | HS         |                                                           |                                                                 | -0.37                                               |
| PRO-24A         | HS         |                                                           |                                                                 | -9.07                                               |
| THR-25A         |            | 0.80                                                      |                                                                 | -5.22                                               |
| HIS-26A         |            |                                                           |                                                                 | -2.24                                               |
| LEU-27A         |            |                                                           |                                                                 | -8.93                                               |
| LEU-38A         |            | 1.30                                                      |                                                                 | -10.78                                              |
| CYS-39A         | HS         | -0.12                                                     |                                                                 | -3.45                                               |
| VAL-40A         |            |                                                           |                                                                 | -5.72                                               |
| <b>ASP-41A</b>  | HS         | 3.81                                                      | 3.49                                                            | 14.47                                               |
| PHE-60A         | HS         | 1.53                                                      | 0.56                                                            | -9.73                                               |
| <b>LYS-61A</b>  |            |                                                           |                                                                 | -1.11                                               |
| MET-62A         | HS         | 1.11                                                      | 0.46                                                            | -10.24                                              |
| TYR-64A         |            | 1.14                                                      | 1.27                                                            | -7.46                                               |
| VAL-66A         | HS         | 1.58                                                      | 1.89                                                            | -11.93                                              |
| <b>ASN-67A</b>  |            |                                                           |                                                                 | -1.54                                               |
| <b>TYR-69A</b>  |            | 2.69                                                      | 2.33                                                            | -8.95                                               |
| Met72           | HS         |                                                           | 0.12                                                            |                                                     |
| ASP-126A        |            | 1.01                                                      |                                                                 | 0.65                                                |
| <b>THR-127A</b> |            |                                                           |                                                                 | -3.3                                                |
| PRO-128A        |            |                                                           |                                                                 | -0.19                                               |
| ASN-129A        |            |                                                           |                                                                 | -6.45                                               |
| ASN-130A        | HS         | 0.36                                                      | 1.03                                                            | 1.58                                                |
| THR-131A        | HS         | 0.60                                                      | 0.45                                                            | 5.11                                                |
| LEU-192A        |            |                                                           |                                                                 | -0.24                                               |
| LYS-196A        |            |                                                           |                                                                 | -1.31                                               |
| LYS-200A        |            |                                                           |                                                                 | -21.5                                               |
| <b>ILE-201A</b> | HS         | 1.61                                                      | 2.03                                                            | -6.71                                               |
| PHE-217A        |            |                                                           |                                                                 | -2.06                                               |
| <b>ALA-1B</b>   |            |                                                           |                                                                 | 94.63                                               |
| ASN-3B          |            | 1.83                                                      | -0.35                                                           | 3.34                                                |
| ALA-4B          | HS         |                                                           |                                                                 | -2.41                                               |

|                |    |       |      |        |
|----------------|----|-------|------|--------|
| THR-5B         | HS | 1.38  | 0.44 | -5.48  |
| GLU-6B         |    |       |      | -56.88 |
| SER-11B        |    |       |      | 4.98   |
| THR-12B        |    |       |      | -2.33  |
| LEU-14B        | HS |       | 0.23 | -2.78  |
| <b>SER-15B</b> | HS |       | 0.51 | -1.62  |
| PHE-16B        | HS | 3.23  | 1.07 | -16.49 |
| ALA-18B        | HS |       |      | -2.51  |
| <b>PHE-19B</b> | HS | 4.55  | 1.34 | -4.03  |
| ALA-20B        |    |       |      | -5.32  |
| <b>VAL-21B</b> |    | 1.19  | 1.21 | -13.16 |
| ALA-26B        |    |       |      | -2.62  |
| <b>ASP-29B</b> |    |       | 1.13 | -49.77 |
| TYR-30B        |    |       |      | -4.16  |
| <b>SER-33B</b> |    | 1.31  | 0.53 | 1.16   |
| VAL-42B        | HS | 1.48  | 1.12 | -11.8  |
| LYS-43B        |    |       |      | 31.59  |
| MET-44B        |    | 1.25  | 0.55 | -14.07 |
| <b>LEU-45B</b> |    |       |      | -7.81  |
| <b>THR-58B</b> |    |       |      | -2.85  |
| PRO-59B        |    |       |      | -2.55  |
| GLY-69B        | HS |       |      | -1.97  |
| ALA-71B        | HS |       |      | -5.37  |
| SER-72B        | HS | -0.15 |      | -1.1   |
| ARG-78B        | HS | 0.32  | 0.84 | 47.97  |
| CYS-79B        | HS |       | 0.08 | -2.59  |
| <b>HIS-80B</b> | HS | 1.47  | 0.17 | -1.83  |
| ILE-81B        |    |       |      | 3.24   |
| HIS-83B        |    |       |      | -3.18  |
| CYS-90B        |    |       |      | -4.54  |
| <b>LYS-93B</b> | HS | 3.49  | 1.55 | 88.01  |
| <b>GLY-94B</b> |    |       |      | -2.46  |
| LYS-95B        |    |       |      | 38.03  |
| <b>TYR-96B</b> | HS | 5.34  | 3.07 | -5.54  |

---

\*HS: Hotspot; Predicted HS depicted in red; H-bond forming residues depicted in blue

**Table S32.** List of interacting residues at protein-protein interacting interface of SARS-CoV NSP14 (Chain A) and NSP10 (Chain B), interface hotspot residues are predicted using three computational methods implemented in KFC, DrugScore<sup>PPI</sup> and Robetta web server. The per-residue energy decomposition analysis was carried out using the last 20 ns MD trajectory.

| Residues        | KFC | Robetta<br>$\Delta\Delta G$ (kcal/mol) | DrugScore PPI<br>$\Delta\Delta G$ (kcal/mol) | Per-residue energy<br>contribution (kJ/mol) |
|-----------------|-----|----------------------------------------|----------------------------------------------|---------------------------------------------|
| ASN-3A          |     |                                        |                                              | 1.07                                        |
| VAL-4A          |     | 1.05                                   | 1.28                                         | -11.36                                      |
| <b>THR-5A</b>   | HS  | 1.04                                   | 0.41                                         | -9.63                                       |
| GLY-6A          |     |                                        |                                              | -2.1                                        |
| LEU-7A          | HS  | 2.07                                   | 1.31                                         | -16.56                                      |
| PHE-8A          | HS  | 2.10                                   | 0.62                                         | -13.63                                      |
| LYS-9A          |     |                                        |                                              | -0.22                                       |
| ASP-10A         |     |                                        |                                              | 5.68                                        |
| PRO-20A         | HS  |                                        |                                              | -4.06                                       |
| <b>THR-21A</b>  | HS  | 0.74                                   | 0.45                                         | -10.65                                      |
| GLN-22A         |     |                                        |                                              | -5.36                                       |
| ALA-23A         | HS  |                                        |                                              | -0.41                                       |
| PRO-24A         | HS  |                                        |                                              | -9.81                                       |
| <b>THR-25A</b>  | HS  | 2.49                                   | 0.85                                         | -14.09                                      |
| <b>HIS-26A</b>  |     |                                        |                                              | -6.44                                       |
| LEU-27A         |     |                                        |                                              | -10.71                                      |
| SER-28A         | HS  | 0.93                                   | 0.24                                         | -2.87                                       |
| VAL-29A         |     |                                        |                                              | -4.49                                       |
| LEU-38A         |     | 1.29                                   | 1.13                                         | -14.12                                      |
| <b>CYS-39A</b>  | HS  | -0.13                                  | 0.31                                         | -5.37                                       |
| VAL-40A         |     |                                        |                                              | -6.85                                       |
| <b>ASP-41A</b>  |     | 1.25                                   | 3.52                                         | 23.56                                       |
| TYR-51A         |     |                                        | 0.60                                         | -2.52                                       |
| ILE-55A         | HS  | 0.64                                   | 0.93                                         | -4.54                                       |
| PHE-60A         | HS  | 0.82                                   | 0.29                                         | -2.3                                        |
| <b>LYS-61A</b>  |     |                                        |                                              | -6.75                                       |
| MET-62A         | HS  | 1.14                                   | 0.53                                         | -11.56                                      |
| TYR-64A         |     | 0.92                                   | 0.91                                         | -9.21                                       |
| VAL-66A         | HS  | 1.58                                   | 1.94                                         | -15.78                                      |
| <b>ASN-67A</b>  |     |                                        |                                              | -1.25                                       |
| <b>TYR-69A</b>  | HS  | 3.35                                   | 2.54                                         | -10.15                                      |
| <b>ASP-126A</b> | HS  | 0.72                                   | 0.61                                         | 12.15                                       |
| THR-127A        |     |                                        |                                              | -4.58                                       |
| GLU-128A        |     |                                        |                                              | -16.74                                      |
| <b>ASN-129A</b> |     |                                        |                                              | -5.47                                       |
| ASN-130A        |     |                                        |                                              | -9.01                                       |
| THR-131A        | HS  | 0.73                                   | 0.38                                         | 6.76                                        |
| LYS-196A        | HS  | -0.21                                  | 0.25                                         | 9.88                                        |
| LYS-200A        |     |                                        |                                              |                                             |
| <b>ILE-201A</b> | HS  | 0.70                                   | 0.94                                         | -5.61                                       |
| PHE-217A        |     |                                        |                                              | -3.79                                       |
| ALA-1B          |     |                                        |                                              | 51.51                                       |

|                |    |       |       |        |
|----------------|----|-------|-------|--------|
| ASN-3B         |    |       |       | 1.41   |
| ALA-4B         |    |       |       | -5.82  |
| <b>THR-5B</b>  | HS | 0.02  | 0.34  | -4.02  |
| <b>GLU-6B</b>  | HS | 7.92  | -0.61 | -18.3  |
| PRO-8B         |    |       |       | -10.07 |
| SER-11B        | HS | -0.07 | 0.24  | 4.78   |
| LEU-14B        | HS | 0.27  | 0.27  | -5.3   |
| <b>SER-15B</b> | HS | 0.76  | 0.37  | -0.7   |
| PHE-16B        | HS | 3.16  | 1.03  | -20.09 |
| <b>PHE-19B</b> | HS | 3.40  | 1.02  | -27.66 |
| ALA-20B        | HS |       |       | -4.92  |
| <b>VAL-21B</b> | HS | 1.46  | 2.08  | -17.08 |
| ALA-26B        | HS |       |       | -3.62  |
| <b>ASP-29B</b> |    | 1.37  | 1.51  | -28.04 |
| TYR-30B        |    |       |       | -5.05  |
| <b>SER-33B</b> |    |       |       | 0.85   |
| <b>ASN-40B</b> | HS | 1.78  | 0.32  | 1.56   |
| CYS-41B        |    |       |       | -2.5   |
| VAL-42B        | HS | 1.87  | 1.98  | -18.43 |
| <b>LYS-43B</b> |    |       |       | 3      |
| MET-44B        |    | 1.21  | 0.51  | -18.26 |
| <b>LEU-45B</b> |    |       |       | -9.55  |
| <b>THR-58B</b> |    |       |       | -3.17  |
| PRO-59B        |    |       |       | -2.87  |
| GLY-69B        | HS |       |       | -3.78  |
| ALA-71B        | HS |       |       | -7.95  |
| SER-72B        | HS | -0.16 | 0.33  | -4.35  |
| ARG-78B        | HS | 2.54  | 0.91  | 10.65  |
| CYS-79B        | HS | -0.02 | 0.15  | -0.21  |
| HIS-80B        | HS | 1.28  | 0.08  | -0.36  |
| ILE-81B        |    |       |       | 4.22   |
| GLY-88B        |    |       |       | 1.48   |
| PHE-89B        |    |       |       | -9.28  |
| <b>CYS-90B</b> |    |       |       | 1.26   |
| <b>LYS-93B</b> | HS | 2.28  | 2.04  | 61.15  |
| <b>GLY-94B</b> |    |       |       | -2.44  |
| LYS-95B        |    |       |       | -8.57  |
| <b>TYR-96B</b> | HS | 2.38  | 2.84  | -5.52  |

\*HS: Hotspot; Predicted HS depicted in red; H-bond forming residues depicted in blue

**Table S33.** List of interacting residues at protein-protein interacting interface of MERS-CoV NSP14 (Chain A) and NSP10 (Chain B), interface hotspot residues are predicted using three computational methods implemented in KFC, DrugScore<sup>PPI</sup> and Robetta web server. The per-residue energy decomposition analysis was carried out using the last 20 ns MD trajectory.

| <b>Residues</b> | <b>KFC</b> | <b>Robetta<br/><math>\Delta\Delta G</math> (kcal/mol)</b> | <b>DrugScore PPI<br/><math>\Delta\Delta G</math> (kcal/mol)</b> | <b>Per-residue energy<br/>contribution (kJ/mol)</b> |
|-----------------|------------|-----------------------------------------------------------|-----------------------------------------------------------------|-----------------------------------------------------|
| LEU-7A          |            | 1.27                                                      |                                                                 | -4.56                                               |
| PHE-8A          | HS         | 2.53                                                      |                                                                 | -8.75                                               |
| PRO-20A         | HS         |                                                           |                                                                 | -1.44                                               |
| <b>ALA-21A</b>  | HS         |                                                           |                                                                 | -6.87                                               |
| TYR-22A         |            | 1.07                                                      | 1.91                                                            | -6.21                                               |
| ALA-23A         | HS         |                                                           |                                                                 | -0.22                                               |
| PRO-24A         | HS         |                                                           |                                                                 | -4.72                                               |
| THR-25A         |            |                                                           |                                                                 | -2.29                                               |
| <b>TYR-26A</b>  |            |                                                           |                                                                 | -3.89                                               |
| VAL-29A         |            |                                                           |                                                                 | -1.24                                               |
| LEU-39A         |            | 1.37                                                      | 1.11                                                            | -7.69                                               |
| <b>CYS-40A</b>  | HS         | -0.11                                                     | 0.24                                                            | -3.1                                                |
| ASN-42A         |            |                                                           |                                                                 | -0.02                                               |
| PHE-60A         |            |                                                           |                                                                 | -5.47                                               |
| <b>LYS-61A</b>  |            |                                                           |                                                                 | 15.15                                               |
| LEU-62A         | HS         | 1.43                                                      | 0.89                                                            | -5.71                                               |
| ALA-64A         |            |                                                           |                                                                 | -0.51                                               |
| VAL-66A         | HS         | 1.23                                                      | 0.93                                                            | -5.68                                               |
| PRO-67A         |            |                                                           |                                                                 | -2.2                                                |
| TYR-69A         |            | 1.92                                                      | 1.00                                                            | -1.77                                               |
| LEU-72A         |            |                                                           |                                                                 | -1.27                                               |
| <b>ASP-126A</b> | HS         | 0.77                                                      | 1.22                                                            | -5.98                                               |
| <b>THR-127A</b> |            |                                                           |                                                                 | -2.43                                               |
| GLU-128A        |            |                                                           |                                                                 | -19.1                                               |
| <b>TRP-129A</b> |            |                                                           |                                                                 | -2.7                                                |
| <b>ASN-131A</b> | HS         | 1.88                                                      | 0.65                                                            | -1.17                                               |
| CYS-199A        |            |                                                           |                                                                 | 0.89                                                |
| LYS-200A        |            | 1.34                                                      | 0.84                                                            | -6.64                                               |
| <b>ILE-201A</b> | HS         | 0.85                                                      | 1.47                                                            | -3.82                                               |
| TYR-217A        |            |                                                           |                                                                 | -1.3                                                |
| <b>SER-15B</b>  | HS         | 0.81                                                      | 0.59                                                            | -0.43                                               |
| LEU-16B         | HS         | 1.01                                                      | 0.33                                                            | -6.99                                               |
| ASN-18B         |            |                                                           |                                                                 | -2.9                                                |
| <b>PHE-19B</b>  | HS         | 3.85                                                      | 1.20                                                            | -14.02                                              |
| THR-20B         | HS         | 0.82                                                      | 0.38                                                            | -1.39                                               |
| VAL-21B         | HS         | 1.49                                                      | 1.67                                                            | -9.46                                               |
| ALA-26B         |            |                                                           |                                                                 | -0.39                                               |
| PHE-30B         |            |                                                           |                                                                 | -4.38                                               |
| ALA-33B         |            |                                                           |                                                                 | -1.4                                                |

|                |           |      |      |              |
|----------------|-----------|------|------|--------------|
| <b>ASN-40B</b> |           |      |      | -3.43        |
| VAL-42B        | HS        | 1.84 | 1.37 | -9.37        |
| <b>LYS-43B</b> |           |      |      | -6.92        |
| MET-44B        |           | 1.29 | 0.50 | -8.23        |
| <b>LEU-45B</b> |           |      |      | -5.79        |
| <b>GLY-69B</b> | <b>HS</b> | -    |      | <b>-1.77</b> |
| ALA-71B        | HS        |      |      | -4.71        |
| SER-72B        |           |      |      | -1.55        |
| ARG-78B        |           |      |      | 11.63        |
| ALA-79B        | HS        |      |      | -1.71        |
| <b>HIS-80B</b> | HS        | 2.47 | 0.29 | -3.07        |
| ILE-81B        |           |      |      | 1.65         |
| VAL-89B        |           |      |      | -3.5         |
| <b>CYS-90B</b> |           |      |      | 0.19         |
| <b>LYS-93B</b> | HS        | 1.43 | 1.30 | 40.99        |
| <b>GLY-94B</b> |           |      |      | -2.77        |
| LYS-95B        |           |      |      | 8.6          |
| PHE-96B        |           | 1.11 | 0.54 | -4.03        |

---

\*HS: Hotspot; Predicted HS depicted in red; H-bond forming residues depicted in blue

| <b>Table of content</b> |                                                                                                                                                                                                                                                                                                                                                                                                                                                                                                                                                                                                                                                                                                                                                                                                                   | <b>Page no.</b> |
|-------------------------|-------------------------------------------------------------------------------------------------------------------------------------------------------------------------------------------------------------------------------------------------------------------------------------------------------------------------------------------------------------------------------------------------------------------------------------------------------------------------------------------------------------------------------------------------------------------------------------------------------------------------------------------------------------------------------------------------------------------------------------------------------------------------------------------------------------------|-----------------|
| <b>Figure S1.</b>       | Amino acid sequence alignment of NSP14 of SARS-CoV-2, SARS-CoV and MERS-CoV obtained from Clustal Omega server. Conserved residues among all the three coronaviruses are depicted as                                                                                                                                                                                                                                                                                                                                                                                                                                                                                                                                                                                                                              | S1              |
| <b>Figure S2.</b>       | Amino acid sequence alignment of NSP10 SARS-CoV-2, SARS-CoV and MERS-CoV obtained from Clustal Omega server. Conserved residues among all the three coronaviruses are depicted as ‘*’                                                                                                                                                                                                                                                                                                                                                                                                                                                                                                                                                                                                                             | S2              |
| <b>Figure S3.</b>       | Representation of hydrophobicity map of average structure (from last 20 ns) SARS-CoV-2 (A), SARS-CoV (B) and (C) MERS-CoV NSP14-NSP10 PPI complex in three different forms. Yellow colour depiction is for NSP10, Brown colour is NSP14. The nonpolar (orange), polar (blue) and neutral regions are depicted for the NSP14.                                                                                                                                                                                                                                                                                                                                                                                                                                                                                      | S3              |
| <b>Figure S4.</b>       | Figure S4. Radius of gyration (Rg) graphs (a) – (c) of NSP14-NSP10 complexes of SARS-CoV-2, SARS-CoV, MERS-CoV ( left side) and SARS-CoV-2 NSP14mutant complexes (right side) along the three sets of 100 ns MD simulation. Triple mutant (in red, in the left plots) is the combination of the three (F233L, P203, L177F) mutations.                                                                                                                                                                                                                                                                                                                                                                                                                                                                             | S4              |
| <b>Figure S5.</b>       | Superimposed average structures (extracted from the last 20 ns MD trajectories of three sets of MD simulation) of SARS-CoV-2 NSP14-NSP10 complex with SARS-CoV and MERS-CoV (a)-(c). On the left side is the NSP14 RMSF plot depicts the C-terminal fluctuating residues encircled in red (from residue 245-268) in replica 1 (a) and 2 (b). The middle square box represents the corresponding fluctuating residue (245-268).                                                                                                                                                                                                                                                                                                                                                                                    | S5              |
| <b>Figure S6.</b>       | Superimposed average structures (from last 20 ns) of (a) NSP10 SARS-CoV-2 (light brown), SARS-CoV (cyan) and MERS-CoV (pink) from the three (b)-(d) sets of MD simulation. Left side represents the RMSF of NSP10 from the three sets of MD simulation (b)-(d). In the middle, superimposed NSP10 3D structure of the three viruses is depicted. On the right side in a square box fluctuating N-terminal region has been focused ranging from 113-131, shows a conformational change from coil to beta strand in case of SARS-CoV (cyan) in all the three sets (b)-(d) of MD simulations..                                                                                                                                                                                                                       | S6              |
| <b>Figure S7.</b>       | (a) – (c) On the left side, representation of superimposed SARS-CoV-2 mutant average structures (from last 20 ns) of NSP14-NSP10 from all the three sets of MD simulations. In a square box in the middle, represented the C terminal fluctuation ranging from residue 113-131 in the NSP10 when it is in complex with mutated NSP14. (a) In case of replica 1, NSP10 with NSP14 (P203L) mutant, shows a conformational change from coil to beta strand. (b) In replica 2, NSP10 with NSP14 (Triple) mutant, shows a conformational change from coil to beta strand. (c) In replica 3, in the right side RMSF plot, does not show much fluctuation as compared to replica 1 and 2, therefore there is no conformational changes observed at position 113-131 (in the middle figure in a square box of replica 3). | S7              |
| <b>Figure S8.</b>       | Solvent Accessible Surface Area (SASA) graphs of (a)-(c) SARS-CoV-2, SARS-CoV, MERS-CoV (left side) and SARS-CoV-2 NSP14mutant complexes (right side) along the three sets of 100 ns MD simulation..                                                                                                                                                                                                                                                                                                                                                                                                                                                                                                                                                                                                              | S8              |
| <b>Figure S9.</b>       | Comparison of the electrostatic surface and charge distribution of NSP14 initial (a)-(c) and average structure (extracted from last 20 ns) (e)-(g) of SARS-CoV-2, SARS-CoV and MERS-CoV. Three views are shown for each PPI complexes. NSP10 secondary structure is depicted in yellow and NSP14 presented in multicolor ribbon and electrostatic charge distribution depicting interface region of NSP14 is shown with positive (blue), negative (red) surface.                                                                                                                                                                                                                                                                                                                                                  | S9              |
| <b>Figure S10.</b>      | Electrostatic surfaces and charge distribution of the NSP14: comparison of the electrostatic surface of the average structure (extracted from last 20 ns) of wild type NSP14 (a) in comparison with different mutant structures (b)-(e). Three views are shown for each PPI complexes. The encircled area (b) in NSP14 (presented in multicolor as ribbon) is the binding interface region for NSP10 (NSP10 is depicted in yellow ribbon, extreme left side).                                                                                                                                                                                                                                                                                                                                                     | S10             |
| <b>Figure S11.</b>      | Cartoon view of the (a) NSP14-NSP10 complex of SARS-CoV-2, common interacting interface hotspot residues among the three viruses (SARS-CoV-2, SARS-CoV and MERS-Co) represented in spheres. The NSP14 is represented in brown, NSP10 in yellow. Hotspot residues are represented in brown spheres (in NSP14), yellow spheres (in NSP10). The represented structure is the average conformer extracted from last 20 ns MD trajectory.                                                                                                                                                                                                                                                                                                                                                                              | S11             |



---

|                   |                                                                                                                                                                                                                                                                                                    |     |
|-------------------|----------------------------------------------------------------------------------------------------------------------------------------------------------------------------------------------------------------------------------------------------------------------------------------------------|-----|
| <b>Table S1.</b>  | PBC Cubic box information for SARS-CoV-2, SARS-CoV and MERS-CoV                                                                                                                                                                                                                                    | S12 |
| <b>Table S2.</b>  | Comparison of interface statistics of the initial NSP14-NSP10 complexes (before MD) of SARS-CoV-2, SARS-CoV and MERS-CoV with the average complex structures extracted from last 20 ns from 100 ns MD trajectory of replica 1. For each complex, interface statistics obtained from PDBsum server. | S13 |
| <b>Table S3.</b>  | Comparison of interface statistics of the initial NSP14-NSP10 complexes (before MD) of SARS-CoV-2, SARS-CoV and MERS-CoV with the average complex structures extracted from last 20 ns from 100 ns MD trajectory of replica 2. For each complex, interface statistics obtained from PDBsum server. | S14 |
| <b>Table S4.</b>  | Comparison of interface statistics of the initial NSP14-NSP10 complexes (before MD) of SARS-CoV-2, SARS-CoV and MERS-CoV with the average complex structures extracted from last 20 ns from 100 ns MD trajectory of replica 3. For each complex, interface statistics obtained from PDBsum server. | S15 |
| <b>Table S5.</b>  | Total number of H-bond involved in the average conformer of SARS-CoV-2 NSP14-NSP10 complex extracted from last 20 ns MD trajectory of replica 1. The interface H-bond results obtained from PDBsum server.                                                                                         | S16 |
| <b>Table S6.</b>  | Total number of H-bond involved in the average conformer of SARS-CoV-2 NSP14-NSP10 complex extracted from last 20 ns MD trajectory of replica 2. The interface H-bond results obtained from PDBsum server.                                                                                         | S17 |
| <b>Table S7.</b>  | Total number of H-bond involved in the average conformer of SARS-CoV-2 NSP14-NSP10 complex extracted from last 20 ns MD trajectory of replica 3. The interface H-bond results obtained from PDBsum server.                                                                                         | S18 |
| <b>Table S8.</b>  | Total number of H-bond involved in the average conformer of SARS-CoV NSP14-NSP10 complex extracted from last 20 ns MD trajectory of replica 1. The interface H-bond results obtained from PDBsum server.                                                                                           | S19 |
| <b>Table S9.</b>  | Total number of H-bond involved in the average conformer of SARS-CoV NSP14-NSP10 complex extracted from last 20 ns MD trajectory of replica 2. The interface H-bond results obtained from PDBsum server.                                                                                           | S20 |
| <b>Table S10.</b> | Total number of H-bond involved in the average conformer of SARS-CoV NSP14-NSP10 complex extracted from last 20 ns MD trajectory of replica 3. The interface H-bond results obtained from PDBsum server.                                                                                           | S21 |
| <b>Table S11.</b> | Total number of H-bond involved in the average conformer of MERS-CoV NSP14-NSP10 complex extracted from last 20 ns MD trajectory of replica 1. The interface H-bond results obtained from PDBsum server                                                                                            | S22 |
| <b>Table S12.</b> | Total number of H-bond involved in the average conformer of MERS-CoV NSP14-NSP10 complex extracted from last 20 ns MD trajectory of replica 2. The interface H-bond results obtained from PDBsum server.                                                                                           | S23 |
| <b>Table S13.</b> | Total number of H-bond involved in the average conformer of MERS-CoV NSP14-NSP10 complex extracted from last 20 ns MD trajectory of replica 3. The interface H-bond results obtained from PDBsum server.                                                                                           | S24 |
| <b>Table S14.</b> | Total number of H-bond involved in the average conformer of SARS-CoV-2 NSP14 <sup>L177F</sup> mutant complex extracted from last 20 ns MD trajectory of replica 1. The interface H-bond results obtained from PDBsum server.                                                                       | S25 |
| <b>Table S15.</b> | Total number of H-bond involved in the average conformer of SARS-CoV-2 NSP14 <sup>L177F</sup> mutant complex extracted from last 20 ns MD trajectory of replica 2. The interface H-bond results obtained from PDBsum server.                                                                       | S26 |
| <b>Table S16.</b> | Total number of H-bond involved in the average conformer of SARS-CoV-2 NSP14 <sup>L177F</sup> mutant complex extracted from last 20 ns MD trajectory of replica 3. The interface H-bond results obtained from PDBsum server.                                                                       | S27 |
| <b>Table S17.</b> | Total number of H-bond involved in the average conformer of SARS-CoV-2 NSP14 <sup>P230L</sup> mutant complex extracted from last 20 ns MD trajectory of replica 1. The interface H-bond results obtained from PDBsum server.                                                                       | S28 |
| <b>Table S18.</b> | Total number of H-bond involved in the average conformer of SARS-CoV-2 NSP14 <sup>P230L</sup> mutant complex extracted from last 20 ns MD trajectory of replica 2. The interface                                                                                                                   | S29 |

---

---

|                   |                                                                                                                                                                                                                                                                                                                                                                                                                               |        |
|-------------------|-------------------------------------------------------------------------------------------------------------------------------------------------------------------------------------------------------------------------------------------------------------------------------------------------------------------------------------------------------------------------------------------------------------------------------|--------|
|                   | H-bond results obtained from PDBsum server                                                                                                                                                                                                                                                                                                                                                                                    |        |
| <b>Table S19.</b> | Total number of H-bond involved in the average conformer of SARS-CoV-2 NSP14 <sup>P230L</sup> mutant complex extracted from last 20 ns MD trajectory of replica 3. The interface H-bond results obtained from PDBsum server                                                                                                                                                                                                   | S30    |
| <b>Table S20.</b> | Total number of H-bond involved in the average conformer of SARS-CoV-2 NSP14 <sup>F233L</sup> mutant complex extracted from last 20 ns MD trajectory of replica 1. The interface H-bond results obtained from PDBsum server.                                                                                                                                                                                                  | S31    |
| <b>Table S21</b>  | Total number of H-bond involved in the average conformer of SARS-CoV-2 NSP14 <sup>F233L</sup> mutant complex extracted from last 20 ns MD trajectory of replica 2. The interface H-bond results obtained from PDBsum server.                                                                                                                                                                                                  | S32    |
| <b>Table S22</b>  | Total number of H-bond involved in the average conformer of SARS-CoV-2 NSP14 <sup>F233L</sup> mutant complex extracted from last 20 ns MD trajectory of replica 3. The interface H-bond results obtained from PDBsum server.                                                                                                                                                                                                  | S33    |
| <b>Table S23.</b> | Total number of H-bond involved in the average conformer of SARS-CoV-2 NSP14 <sup>Triple</sup> mutant complex extracted from last 20 ns MD trajectory of replica 1. The interface H-bond results obtained from PDBsum server.                                                                                                                                                                                                 | S34    |
| <b>Table S24.</b> | Total number of H-bond involved in the average conformer of SARS-CoV-2 NSP14 <sup>Triple</sup> mutant complex extracted from last 20 ns MD trajectory of replica 2. The interface H-bond results obtained from PDBsum server.                                                                                                                                                                                                 | S35    |
| <b>Table S25.</b> | Total number of H-bond involved in the average conformer of SARS-CoV-2 NSP14 <sup>Triple</sup> mutant complex extracted from last 20 ns MD trajectory of replica 3. The interface H-bond results obtained from PDBsum server.                                                                                                                                                                                                 | S36    |
| <b>Table S26.</b> | Total number of H-bond involved in the initial structure (before MD) of SARS-CoV-2 NSP14-NSP10 PPI complex interface obtained from PDBsum server                                                                                                                                                                                                                                                                              | S37    |
| <b>Table S27.</b> | Total number of H-bond involved in the initial structure (before MD) of SARS-CoV NSP14-NSP10 PPI complex interface obtained from PDBsum server                                                                                                                                                                                                                                                                                | S38    |
| <b>Table S28</b>  | Total number of H-bond involved in the initial structure (before MD) of MERS-CoV NSP14-NSP10 PPI complex interface obtained from PDBsum server                                                                                                                                                                                                                                                                                | S39    |
| <b>Table S29</b>  | Salt bridge involved in the initial structure (before MD) of SARS-CoV-2, SARS-CoV and MERS-CoV of NSP14-NSP10 PPI complex. The salt bridges atom-atom interaction at PPI interface obtained from PDBsum server                                                                                                                                                                                                                | S40    |
| <b>Table S30</b>  | Salt bridge involved in the average conformer of SARS-CoV-2, SARS-CoV and MERS-CoV NSP14-NSP10 complex extracted from last 20 ns MD trajectory from all the three sets of MD simulations. The salt bridge atom-atom interactions across protein-protein interface results are obtained from PDBsum server. In SARS-CoV-2 MD simulation replica 2 and 3, and SARS-CoV-2 <sup>F233L</sup> replica 2 does not form salt bridges. | S41    |
| <b>Table S31</b>  | List of interacting residues at protein-protein interacting interface of SARS-CoV-2 NSP14 (Chain A) and NSP (Chain B), interface hotspot residues are predicted using three computational methods implemented in KFC, DrugScore <sup>PPI</sup> and Robetta web server. The per-residue energy decomposition analysis was carried out using the last 20 ns MD trajectory.                                                      | S42-43 |
| <b>Table S32</b>  | List of interacting residues at protein-protein interacting interface of SARS-CoV NSP14 (chain A) and NSP10 (chain B), interface hotspot residues are predicted using three computational methods implemented in KFC, DrugScore <sup>PPI</sup> and Robetta web server. The per-residue energy decomposition analysis was carried out using the last 20 ns MD trajectory.                                                      | S44-45 |
| <b>Table S33</b>  | List of interacting residues at protein-protein interacting interface of MERS-CoV NSP14 (chain A) and NSP8 (chain B), interface hotspot residues are predicted using three computational methods implemented in KFC, DrugScore <sup>PPI</sup> and Robetta web server. The per-residue energy decomposition analysis was carried out using the last 20 ns MD trajectory.                                                       | S46-47 |

---
